# Supplementary material for: Structural Congeners of Izenamides Responsible for Cathepsin D Inhibition: Insights from Synthesis-Derived Elucidation
Source: MDPI journal article supplement (doi:10.3390/md21050281), 2023-04-28
Supplement: s1 [file s1]

# Supporting Information

## Structural Congeners of Izenamides Responsible for Cathepsin D Inhibition: Insights from Synthesis-Derived Elucidation

Hyun Su Kim <sup>1</sup>, Hyejin Kong <sup>1</sup>, Taewoo Kim <sup>1</sup>, Changjin Lim <sup>2</sup>, Seungbeom Lee <sup>1</sup>, Seok-Ho Kim <sup>3</sup>  
and Young-Ger Suh <sup>1,\*</sup>

<sup>1</sup> College of Pharmacy and Institute of Pharmaceutical Sciences, CHA University, 120 Haeryong-ro, Pocheon 11160, Gyeonggi-do, Republic of Korea

<sup>2</sup> School of Pharmacy, Jeonbuk National University, Jeonju 54896, Republic of Korea

<sup>3</sup> College of Pharmacy, Kangwon National University, Chuncheon, Gangwon-do 24341, Republic of Korea

### List of Contents

|                                                                                                                              |         |
|------------------------------------------------------------------------------------------------------------------------------|---------|
| I. <sup>1</sup> H NMR and <sup>13</sup> C NMR spectra .....                                                                  | S1-S17  |
| II. Comparison of <sup>1</sup> H, <sup>13</sup> C NMR spectra of acetamide <b>24</b> , <b>27</b> , and <b>28</b> .....       | S18-S19 |
| III. Comparison of <sup>1</sup> H, <sup>13</sup> C NMR spectra of Izenamide B Variants ( <b>4-6</b> ) and ( <b>8</b> ) ..... | S20-S22 |
| IV. HRMS spectra of Izenamide Variants ( <b>4-8</b> ) .....                                                                  | S23-S28 |

# I. $^1\text{H}$ NMR and $^{13}\text{C}$ NMR spectra

## $^1\text{H}$ NMR and $^{13}\text{C}$ NMR spectra of **24**

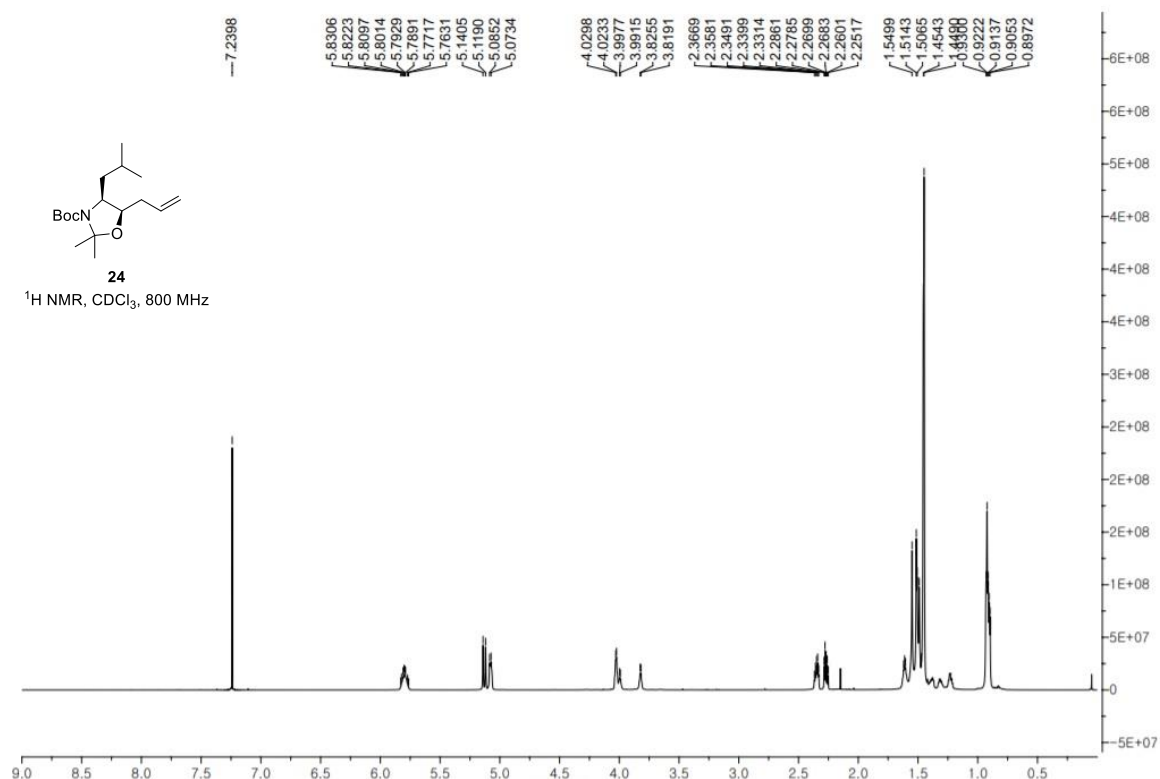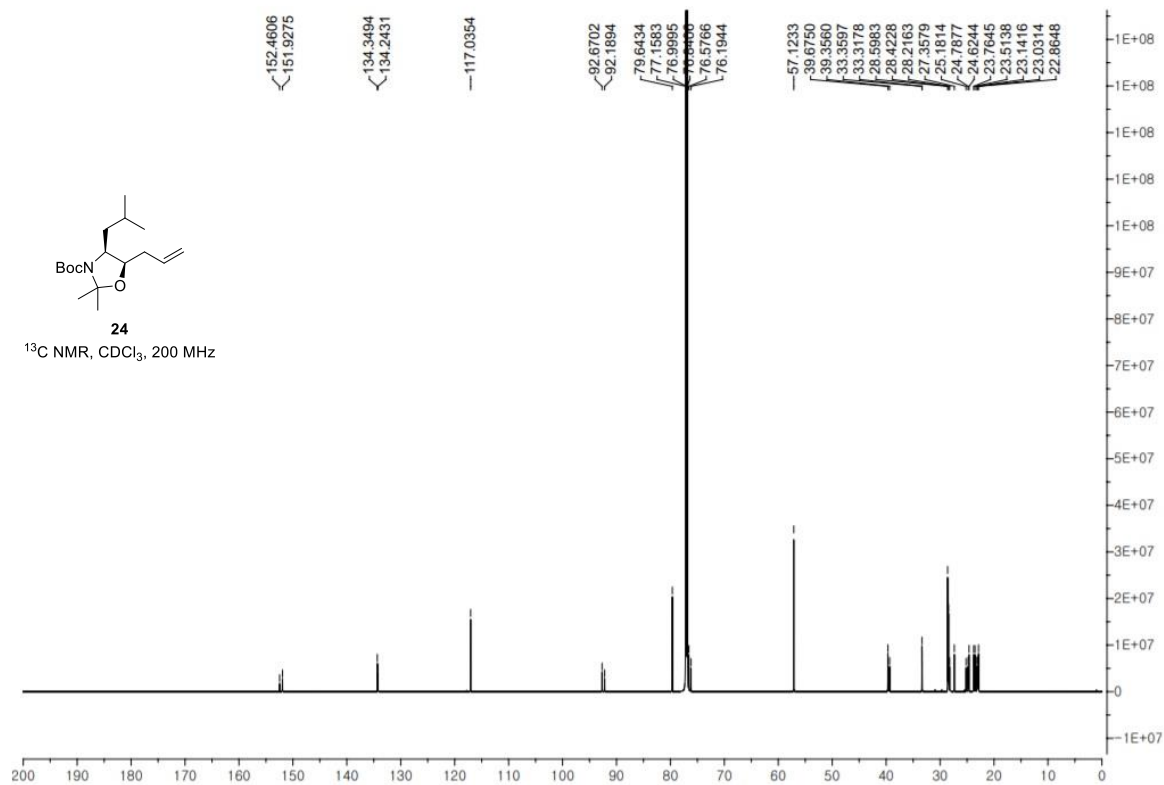

# <sup>1</sup>H NMR and <sup>13</sup>C NMR spectra of **25**

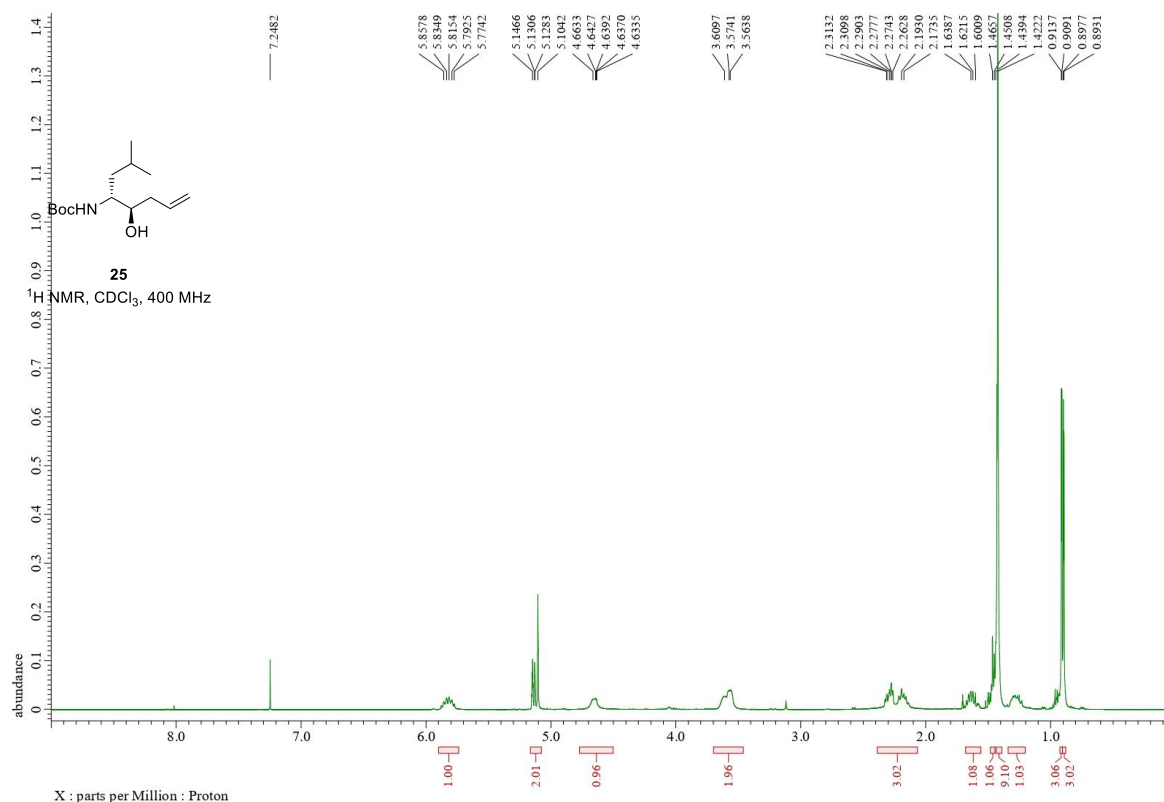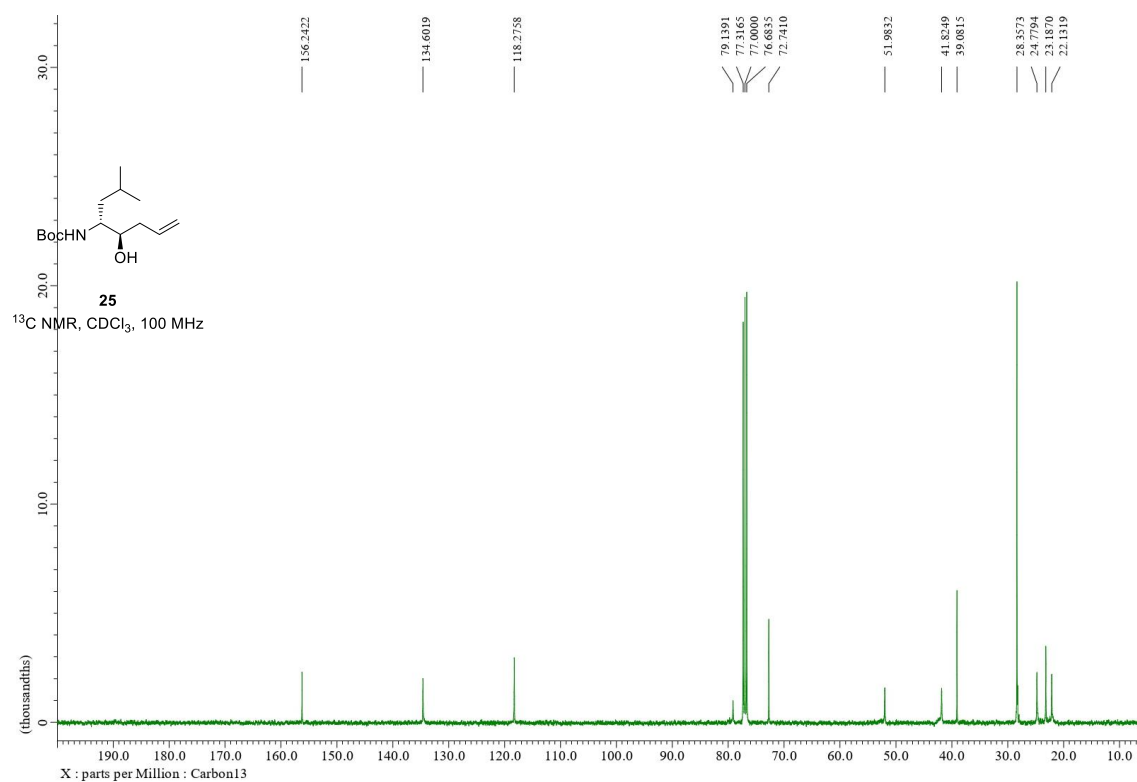

# <sup>1</sup>H NMR and <sup>13</sup>C NMR spectra of **26**

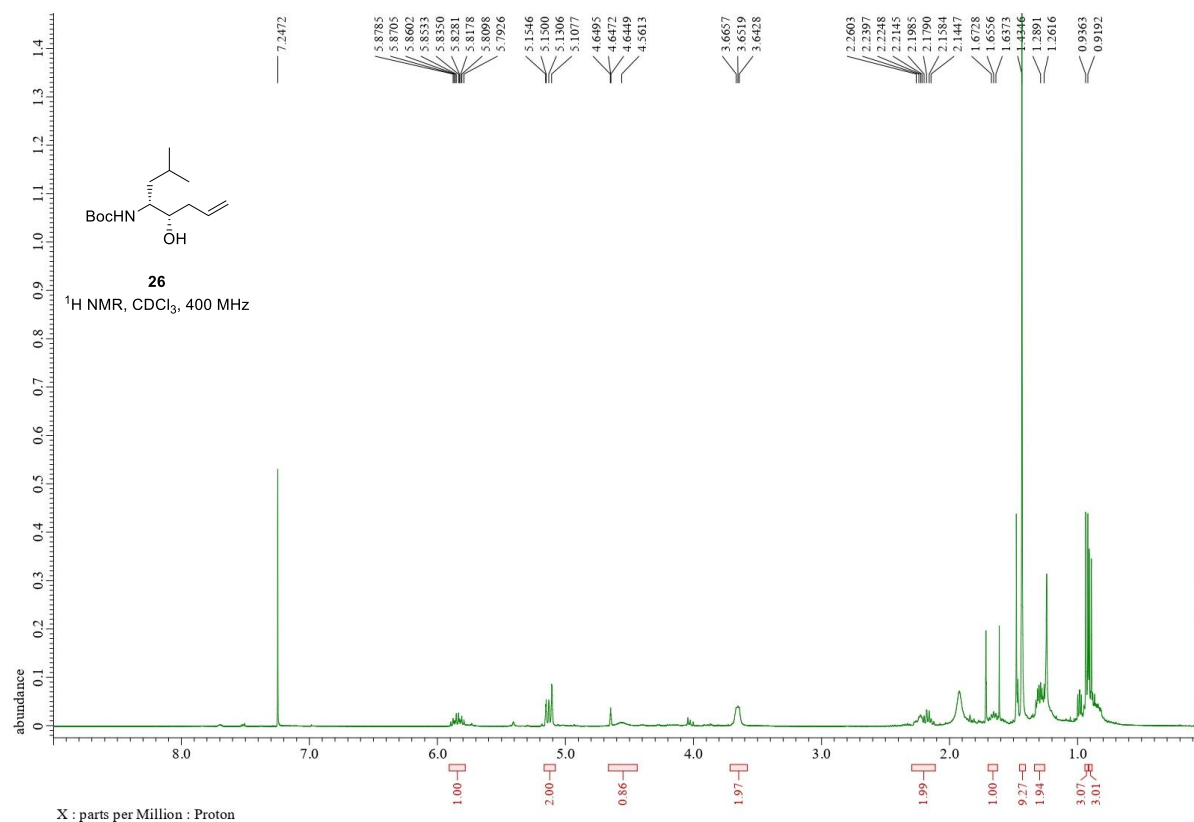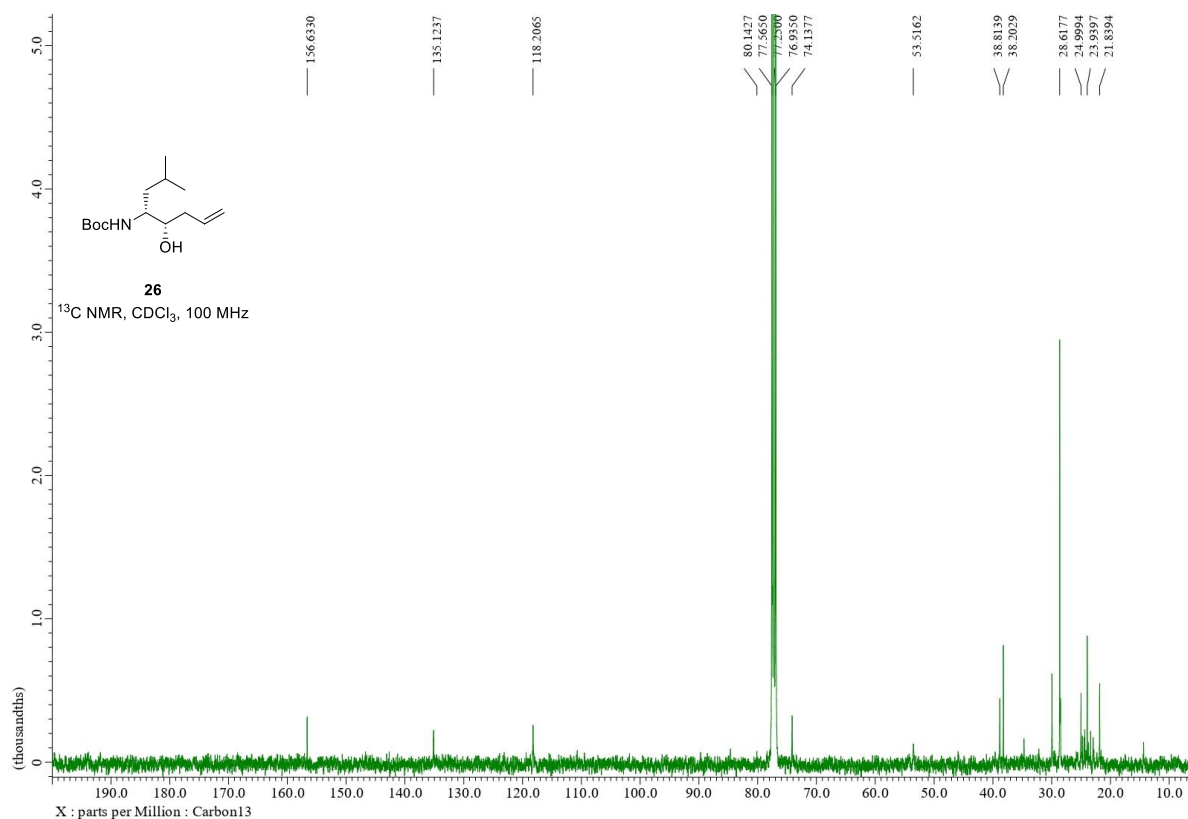

$^1\text{H}$  NMR and  $^{13}\text{C}$  NMR spectra of **27**

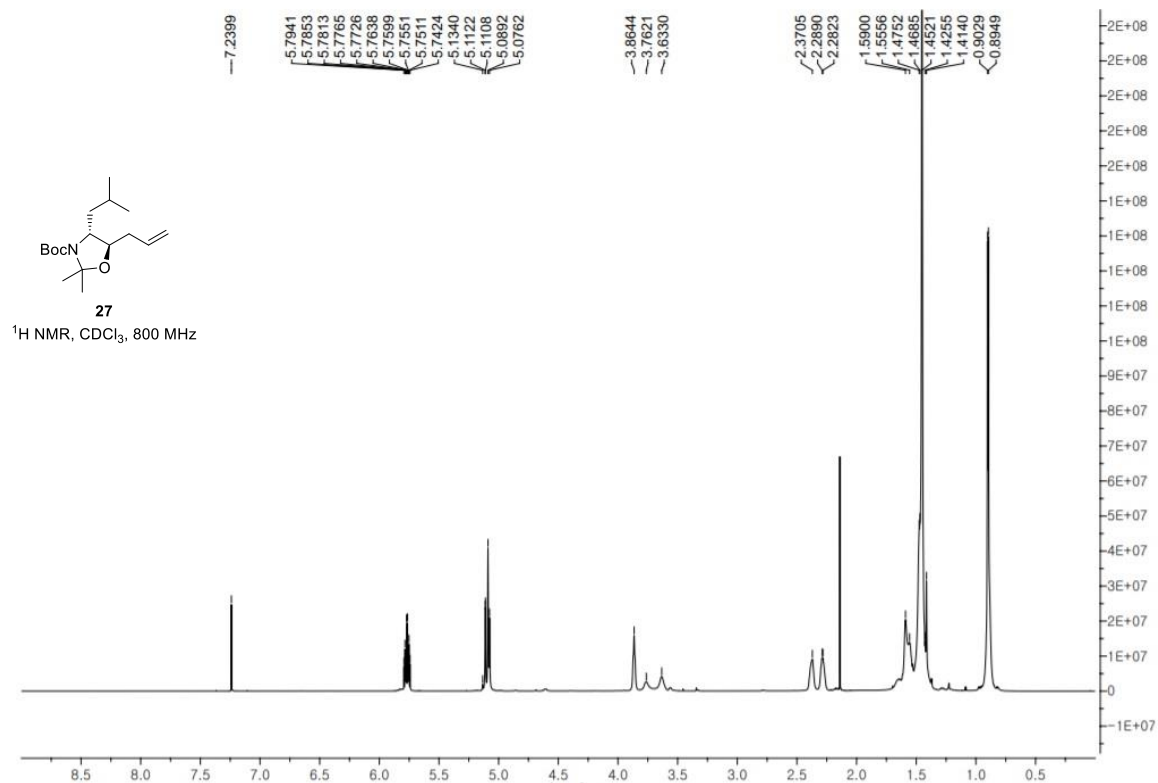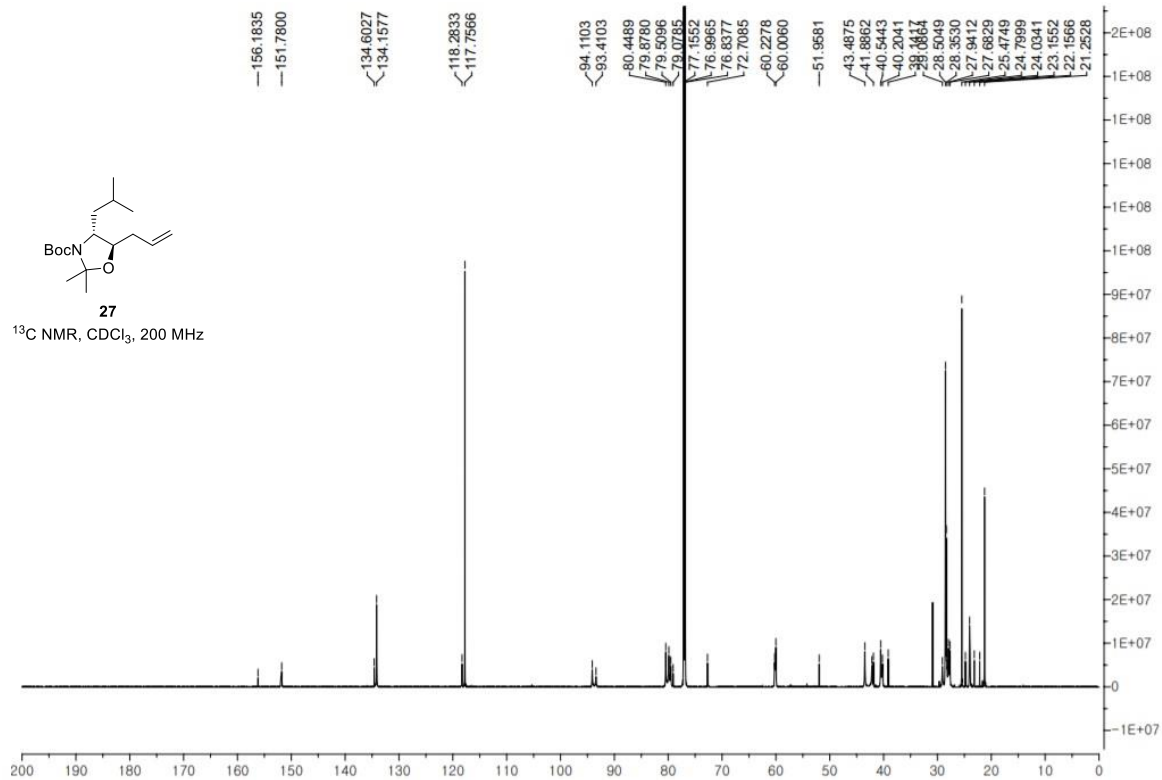

# <sup>1</sup>H NMR and <sup>13</sup>C NMR spectra of **28**

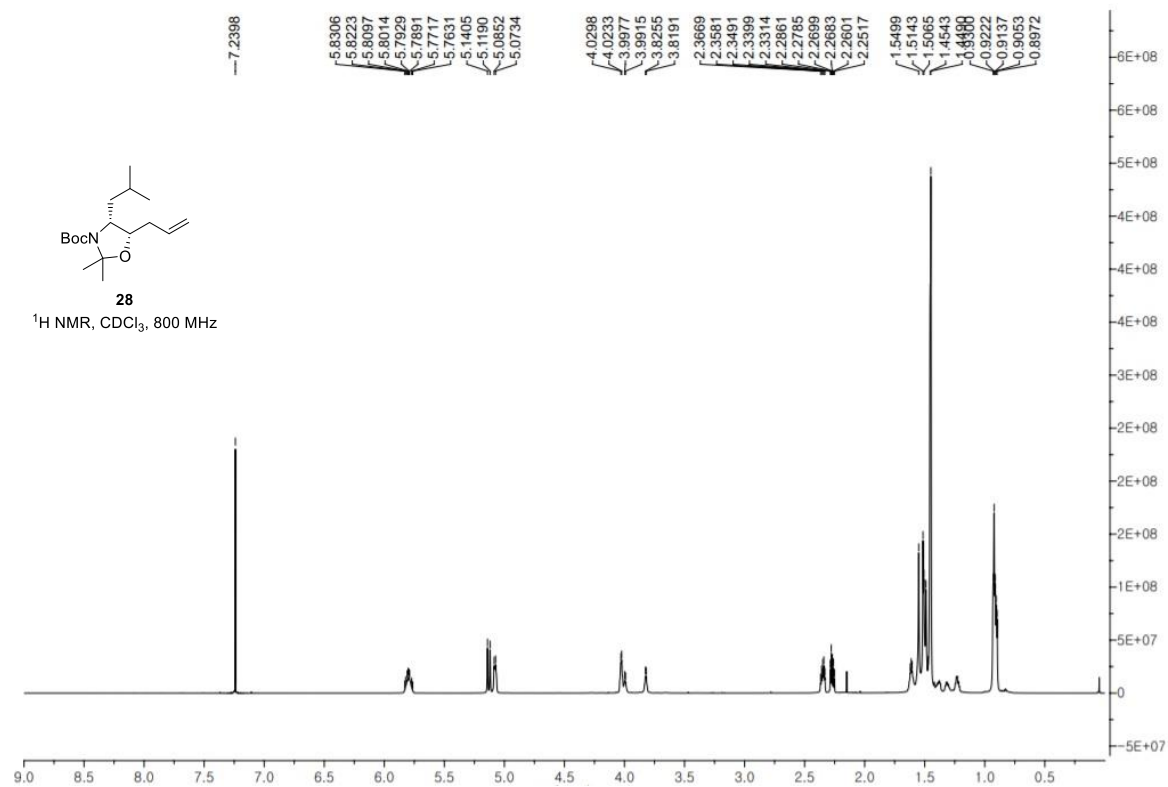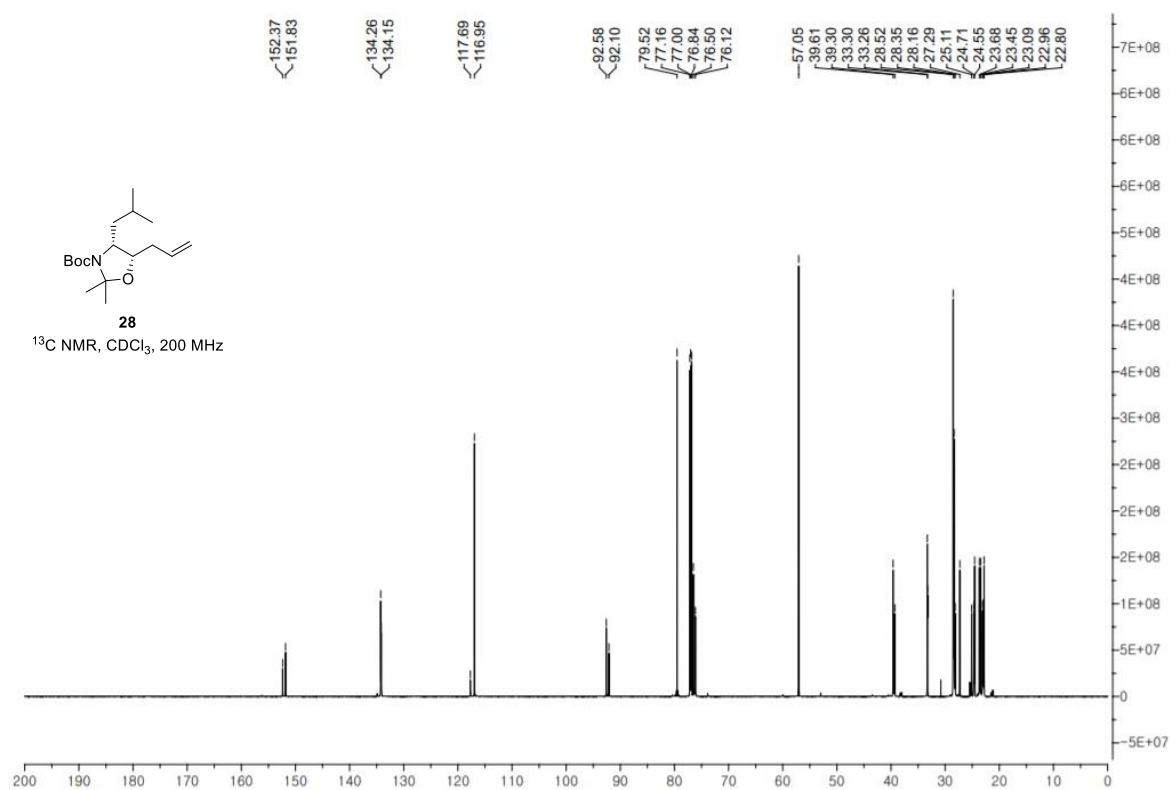

# <sup>1</sup>H NMR and <sup>13</sup>C NMR spectra of **29**

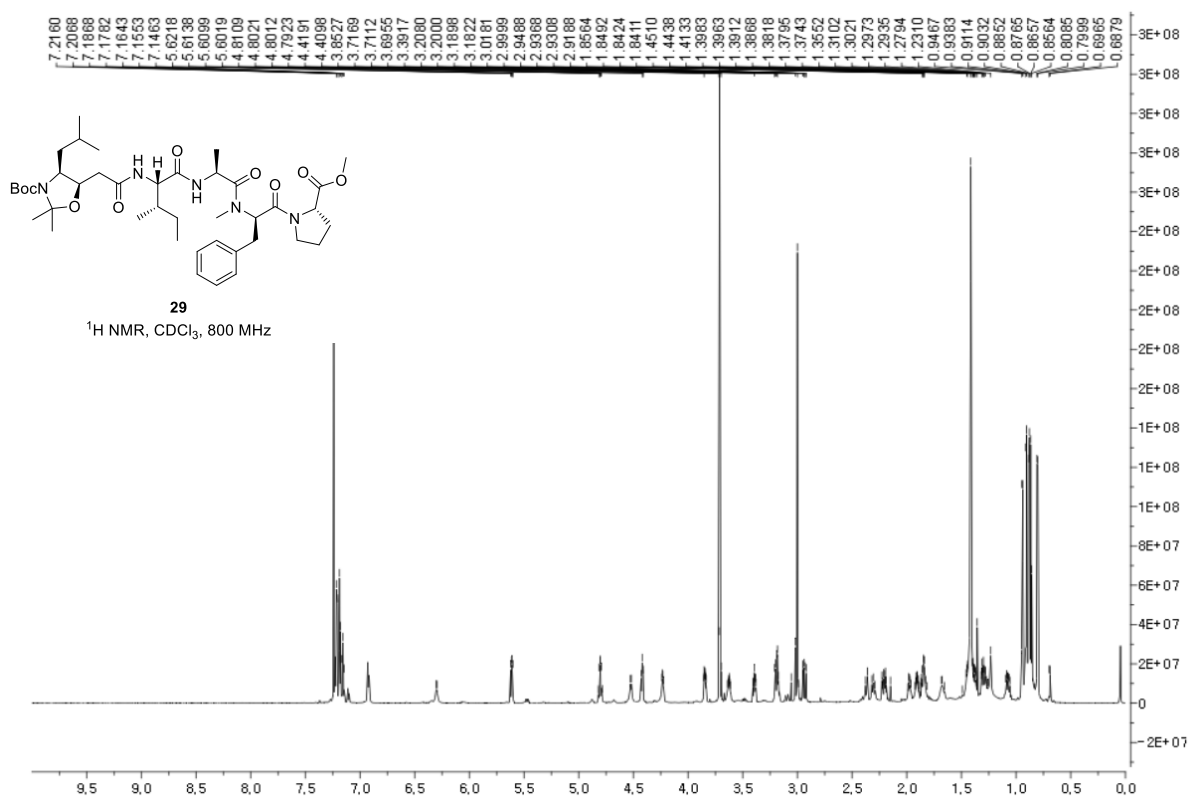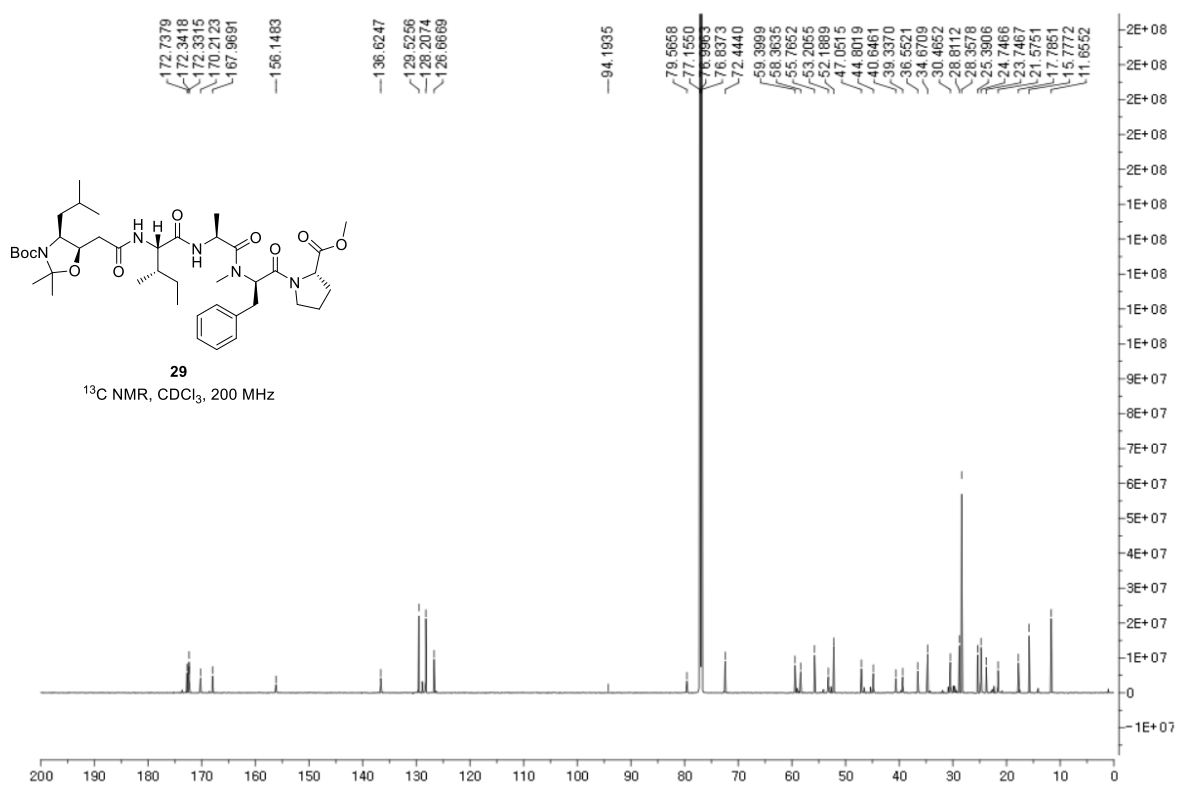

# <sup>1</sup>H NMR and <sup>13</sup>C NMR spectra of **30**

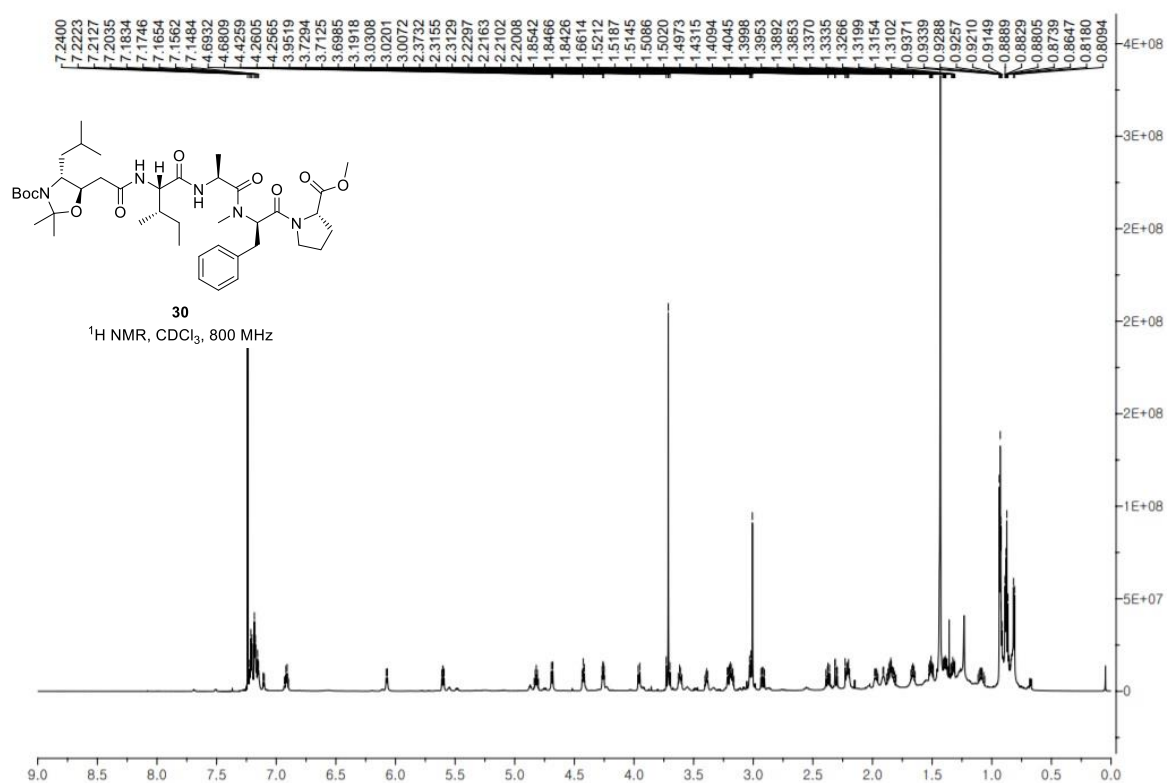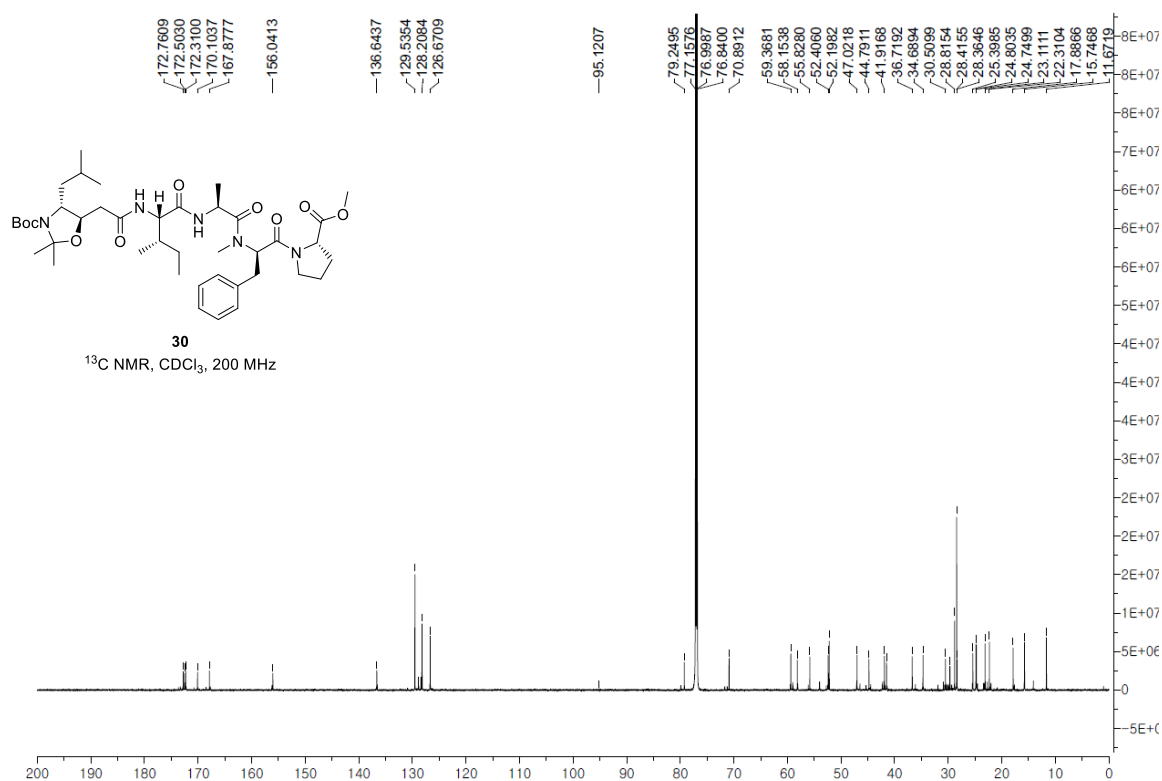

# <sup>1</sup>H NMR and <sup>13</sup>C NMR spectra of **31**

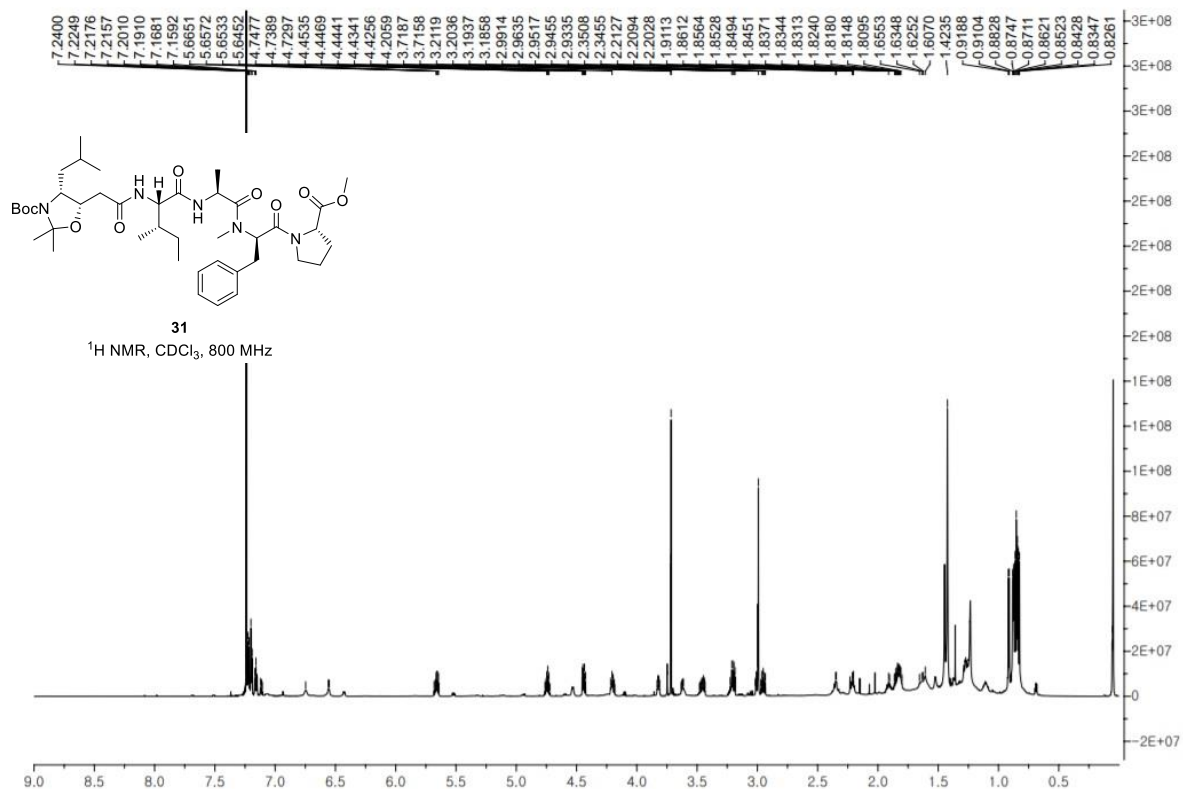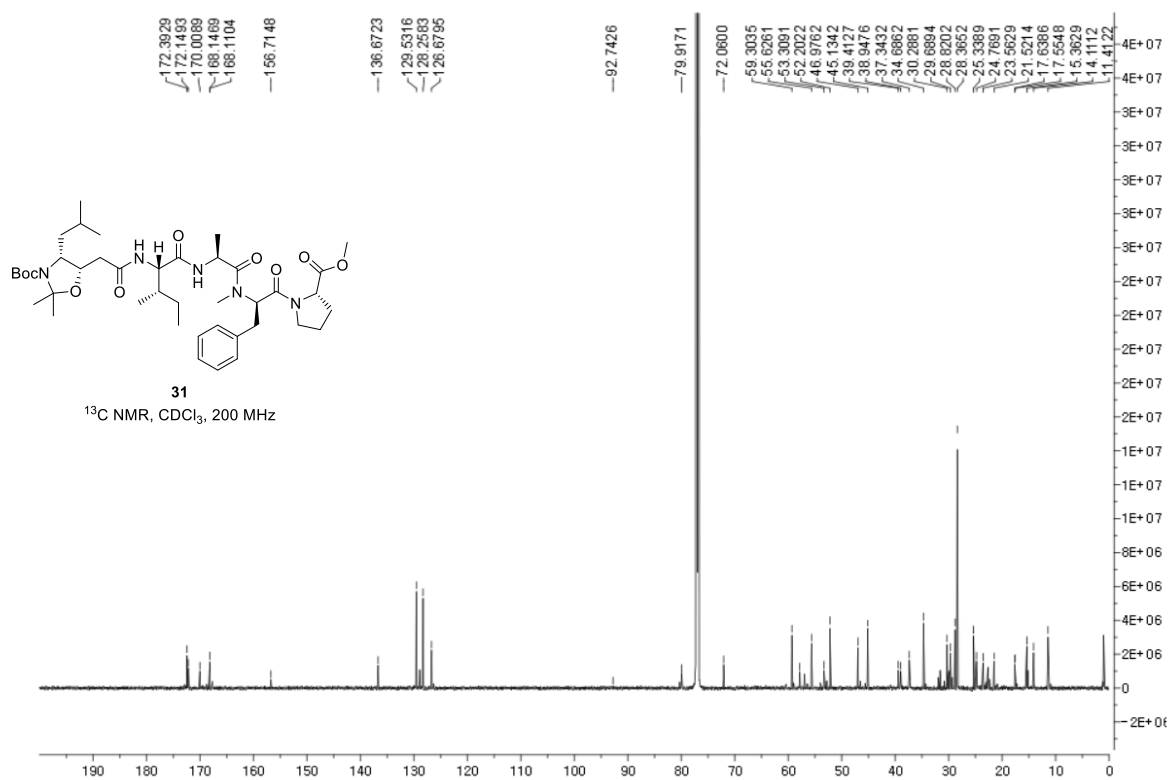

<sup>1</sup>H NMR and <sup>13</sup>C NMR spectra of izenamide B variant (**4**)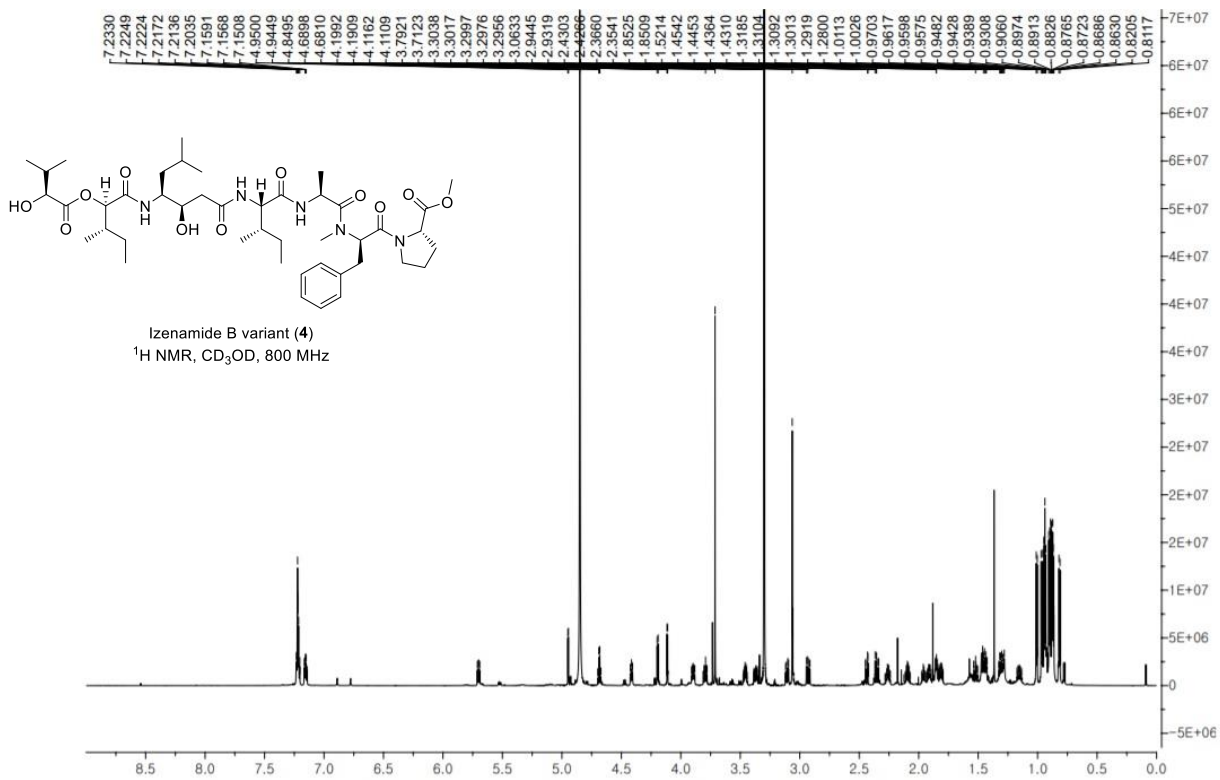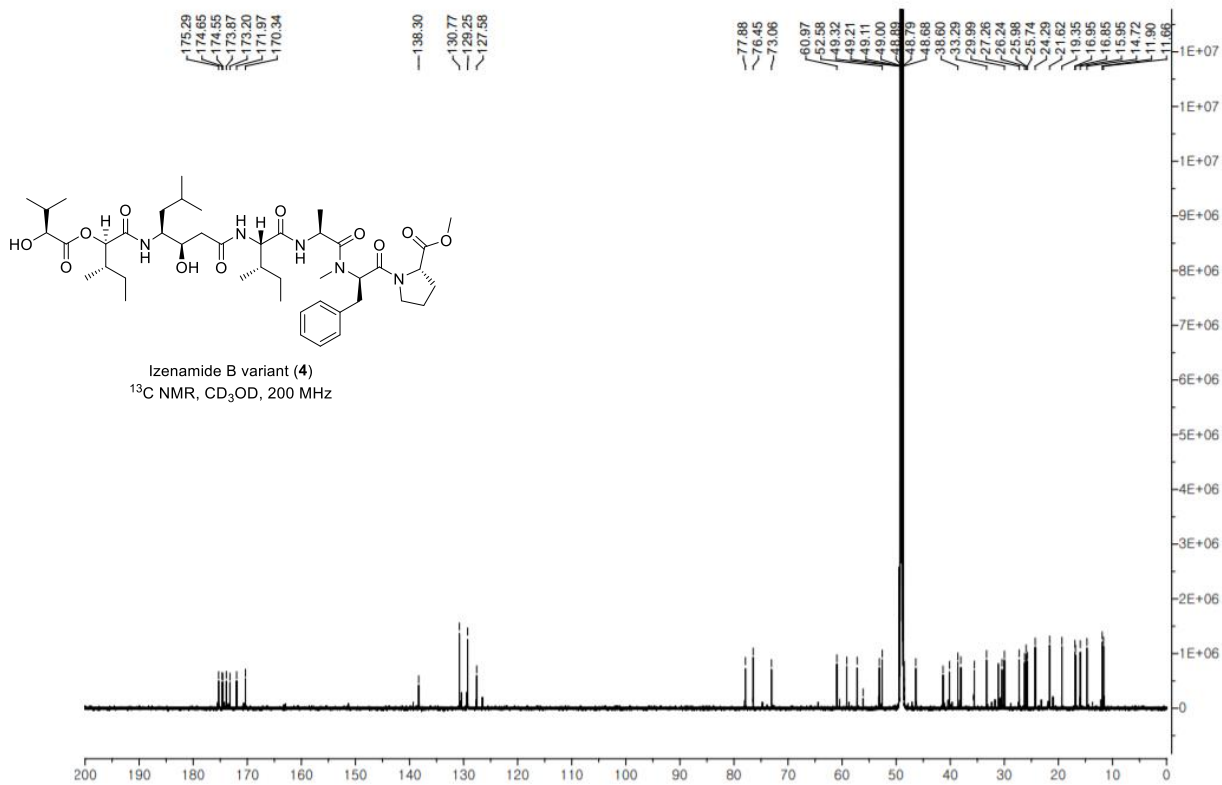

<sup>1</sup>H NMR and <sup>13</sup>C NMR spectra of izenamide B variant (5)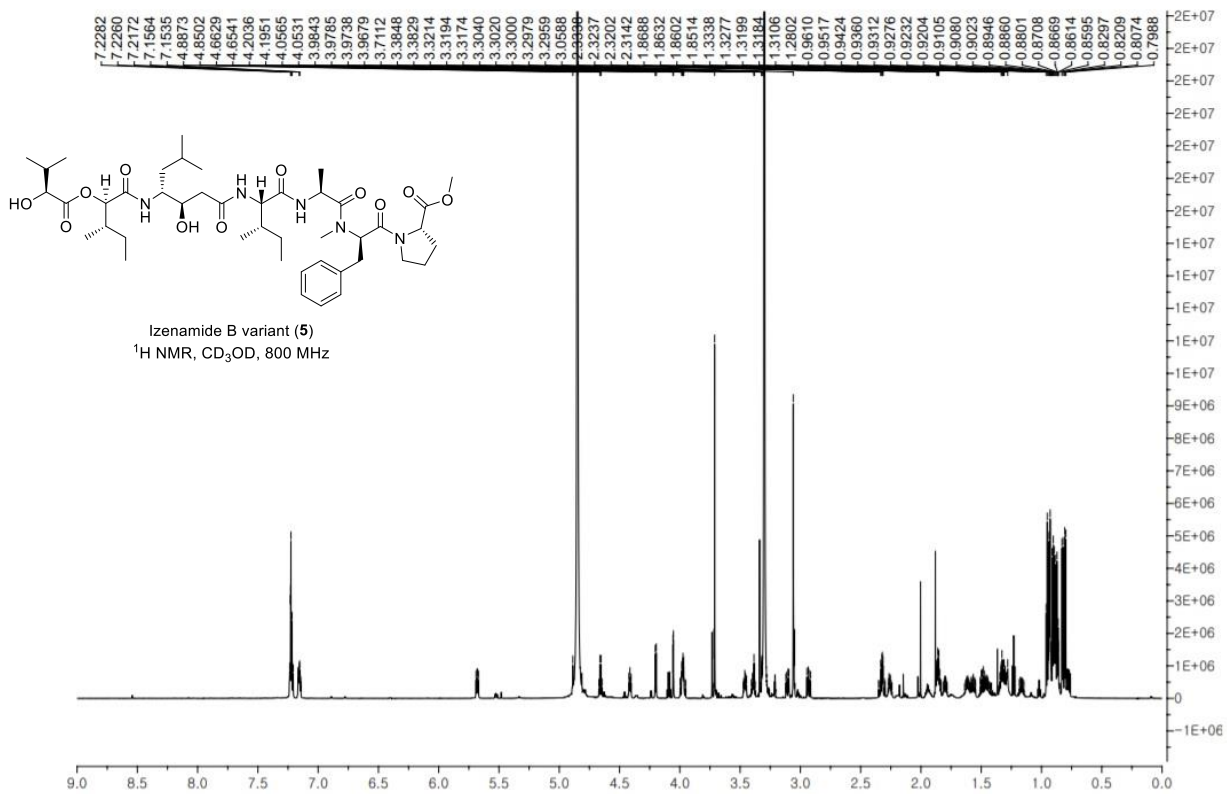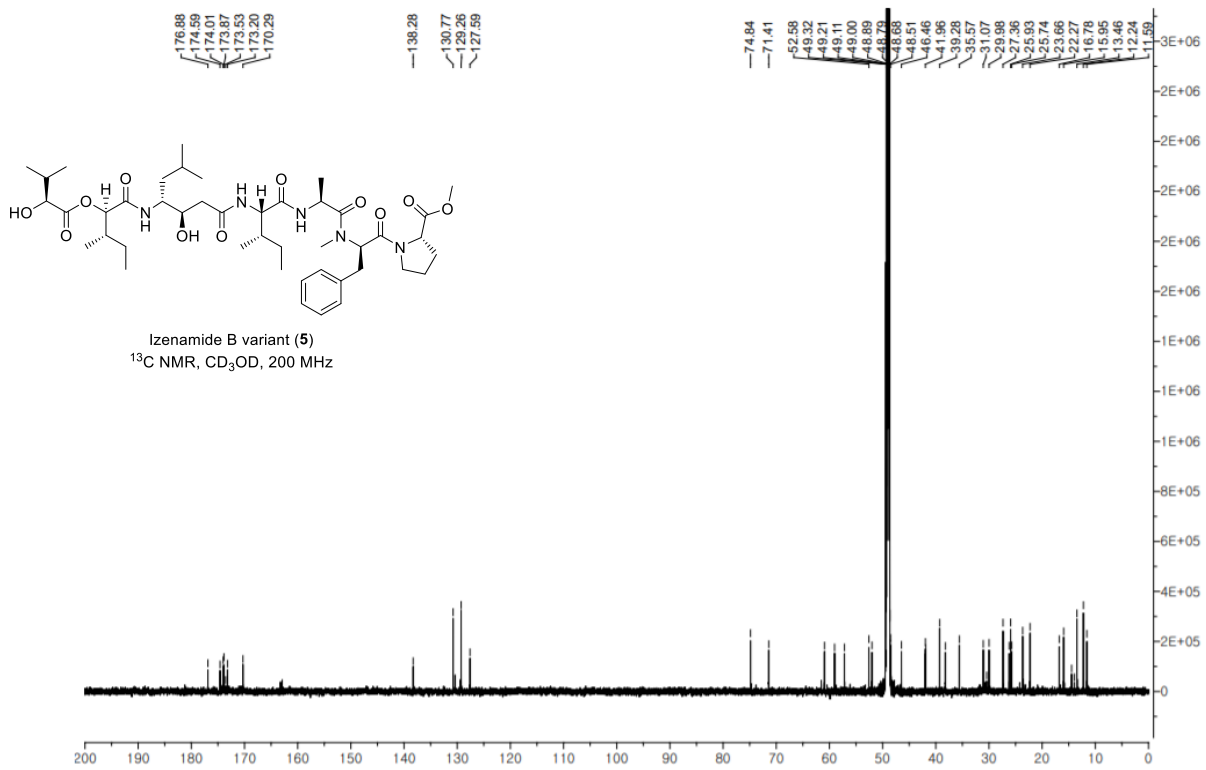

$^1\text{H}$  NMR and  $^{13}\text{C}$  NMR spectra of izenamide B variant (6)

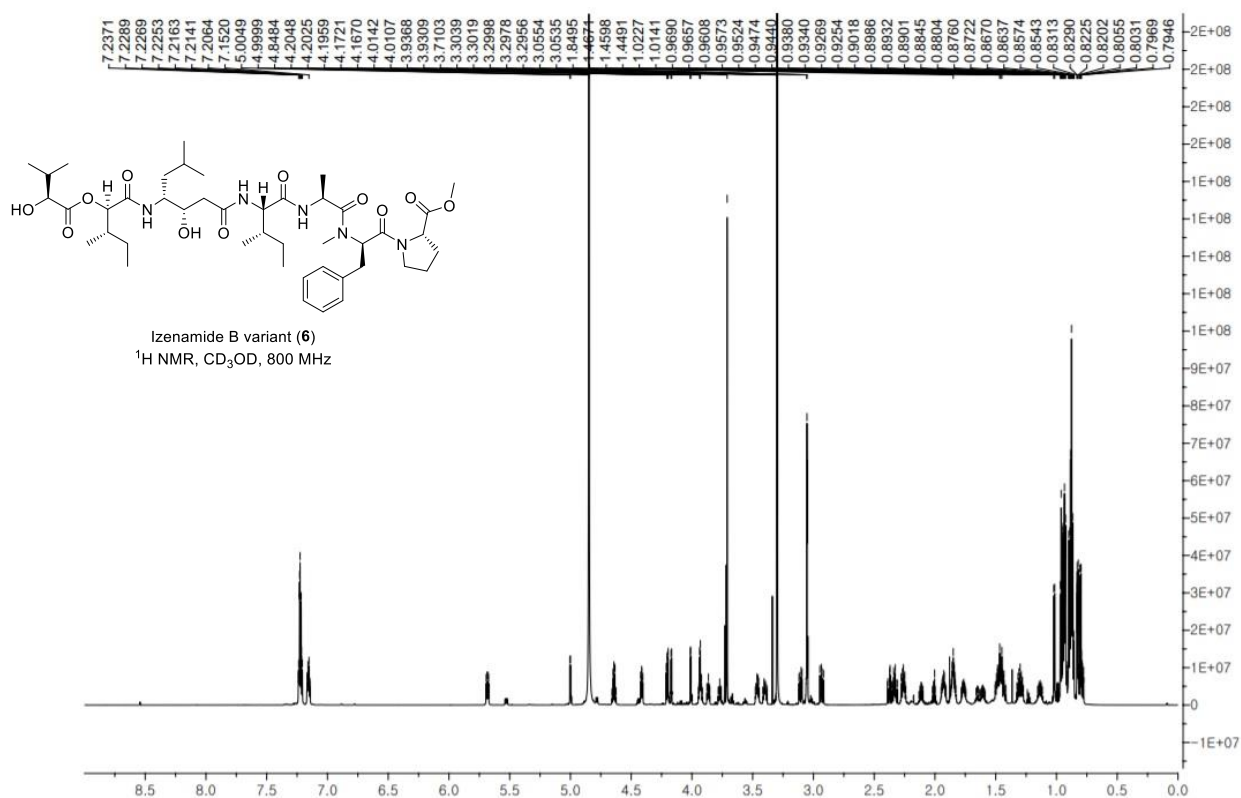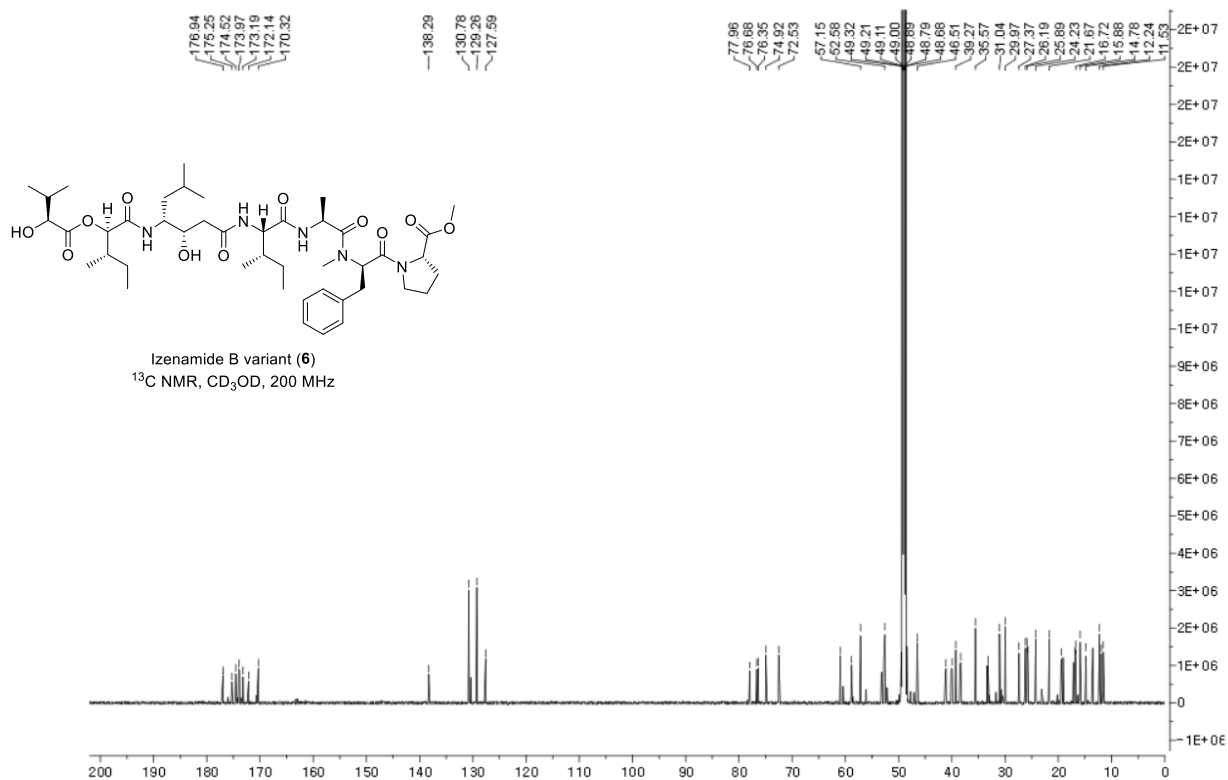

# <sup>1</sup>H NMR and <sup>13</sup>C NMR spectra of **20**

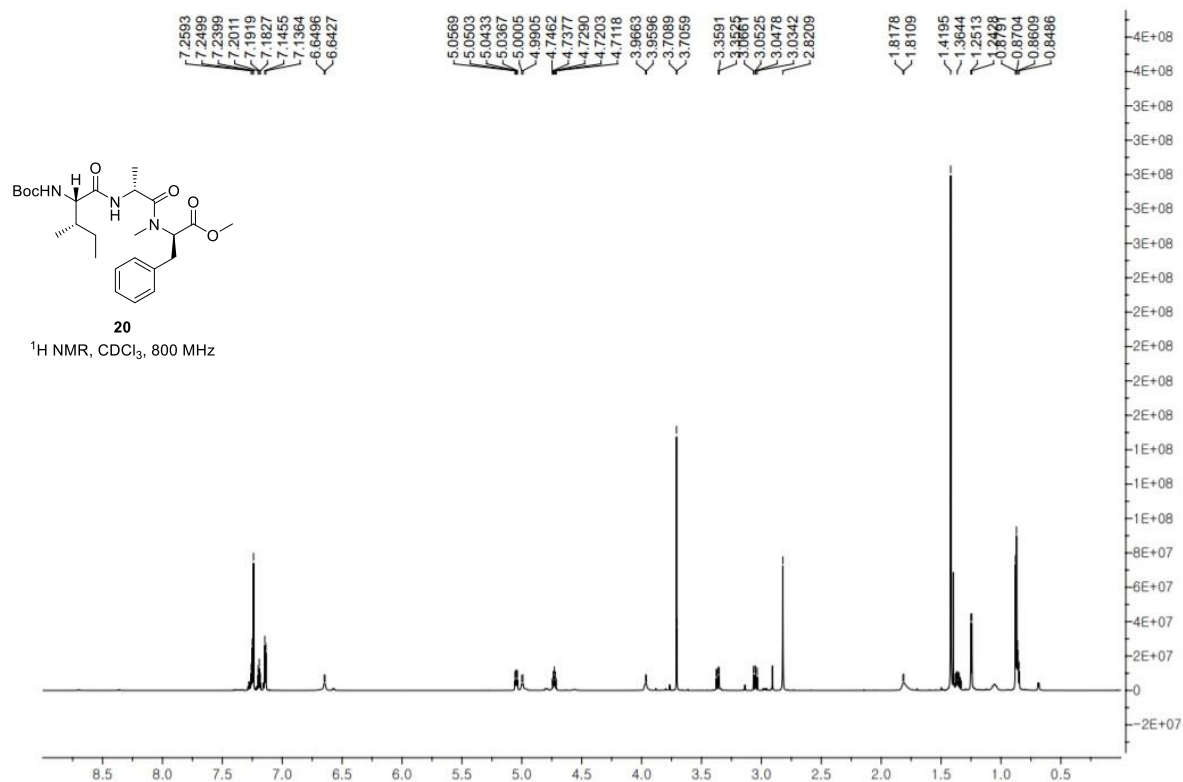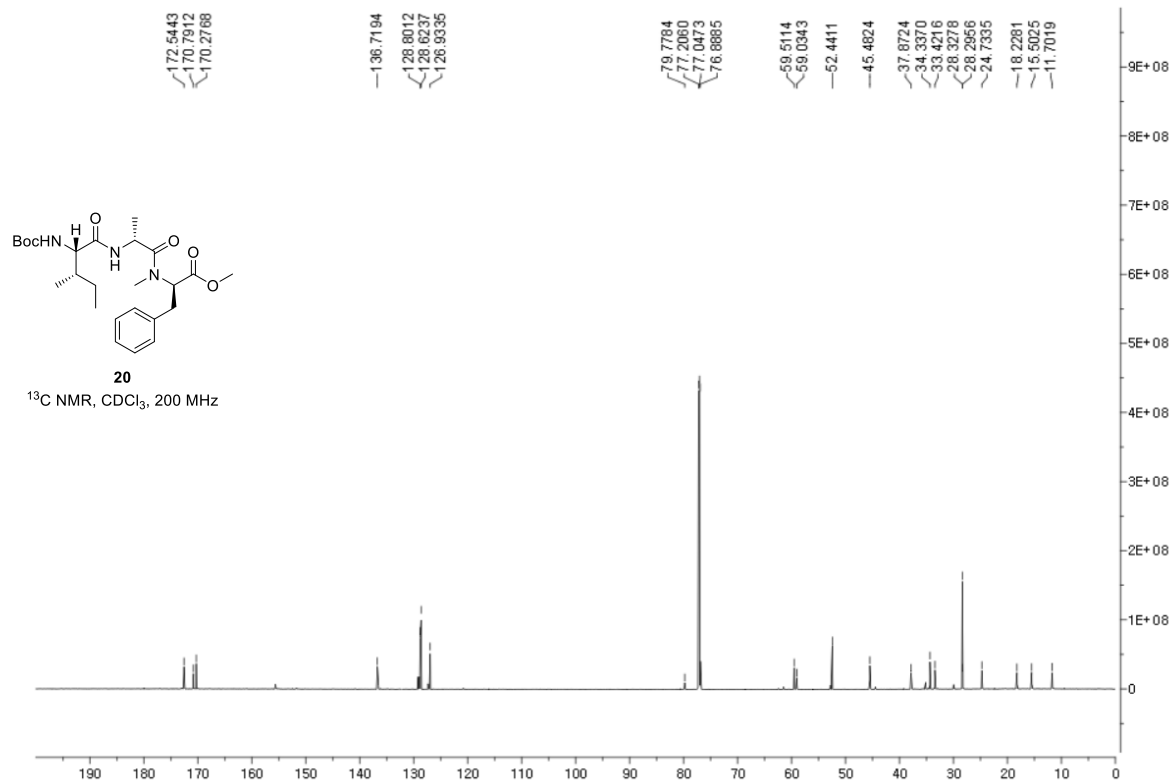

# <sup>1</sup>H NMR and <sup>13</sup>C NMR spectra of **15**

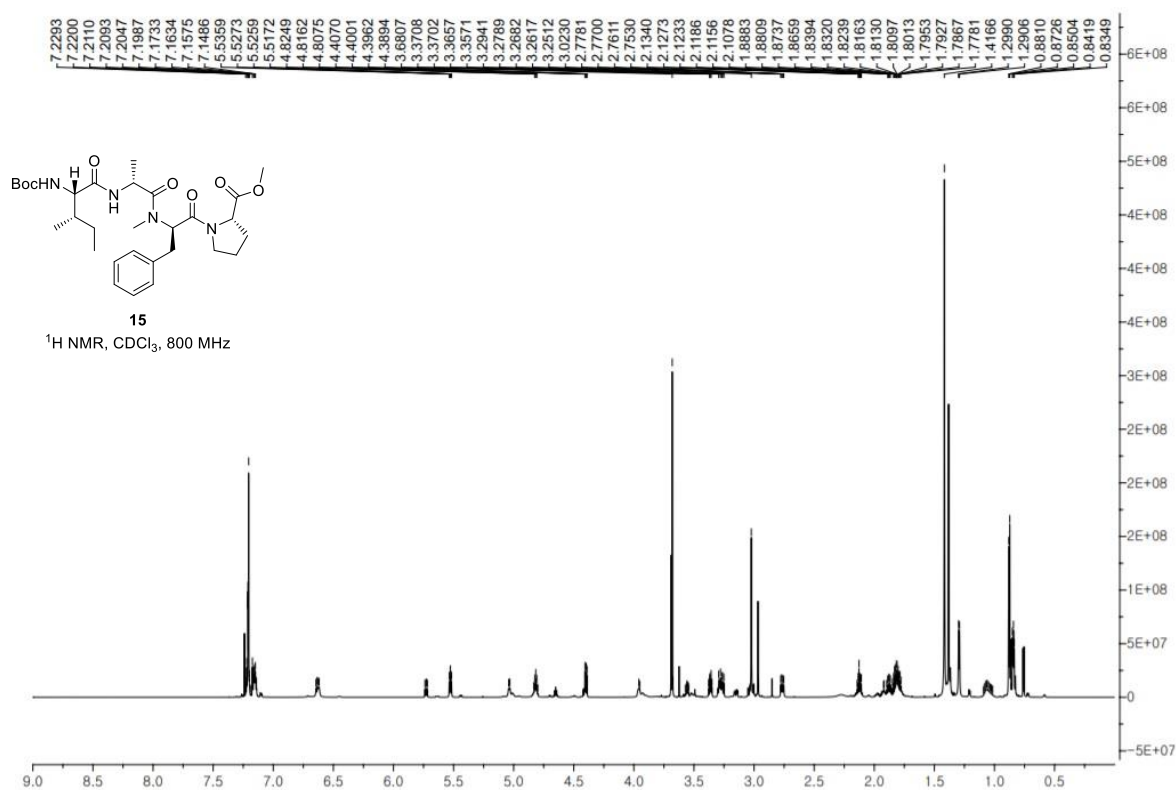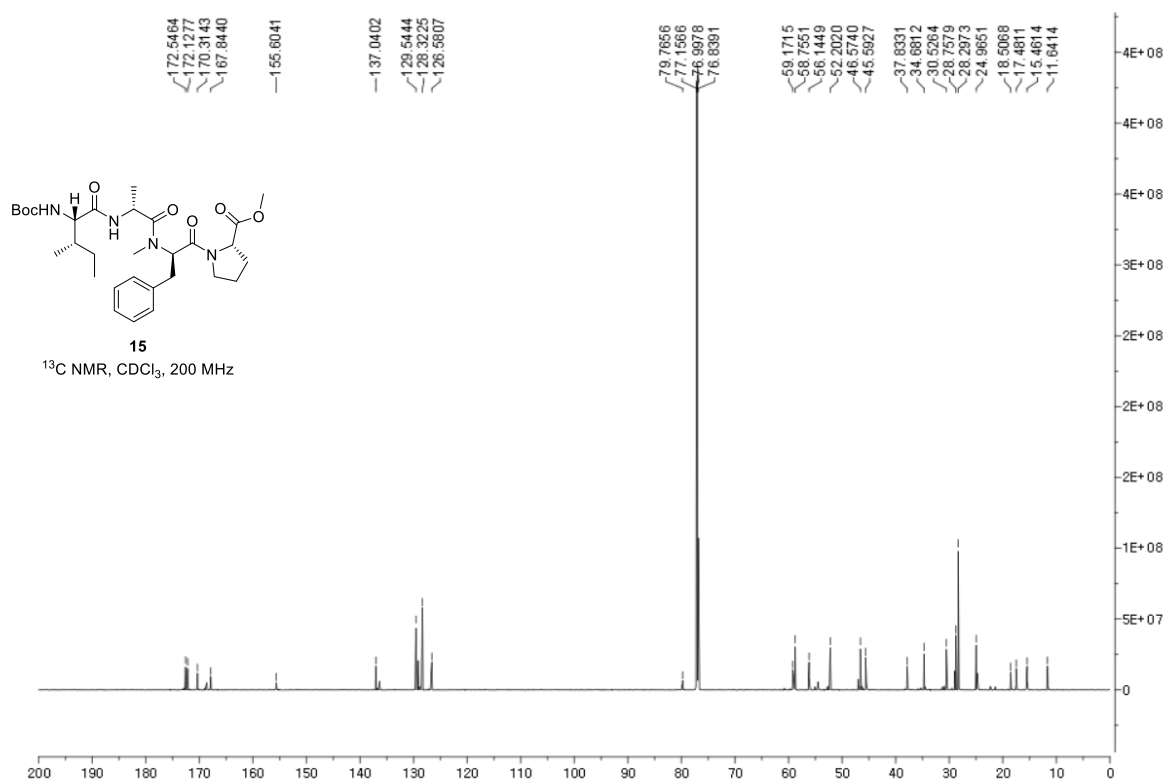

# <sup>1</sup>H NMR and <sup>13</sup>C NMR spectra of **33**

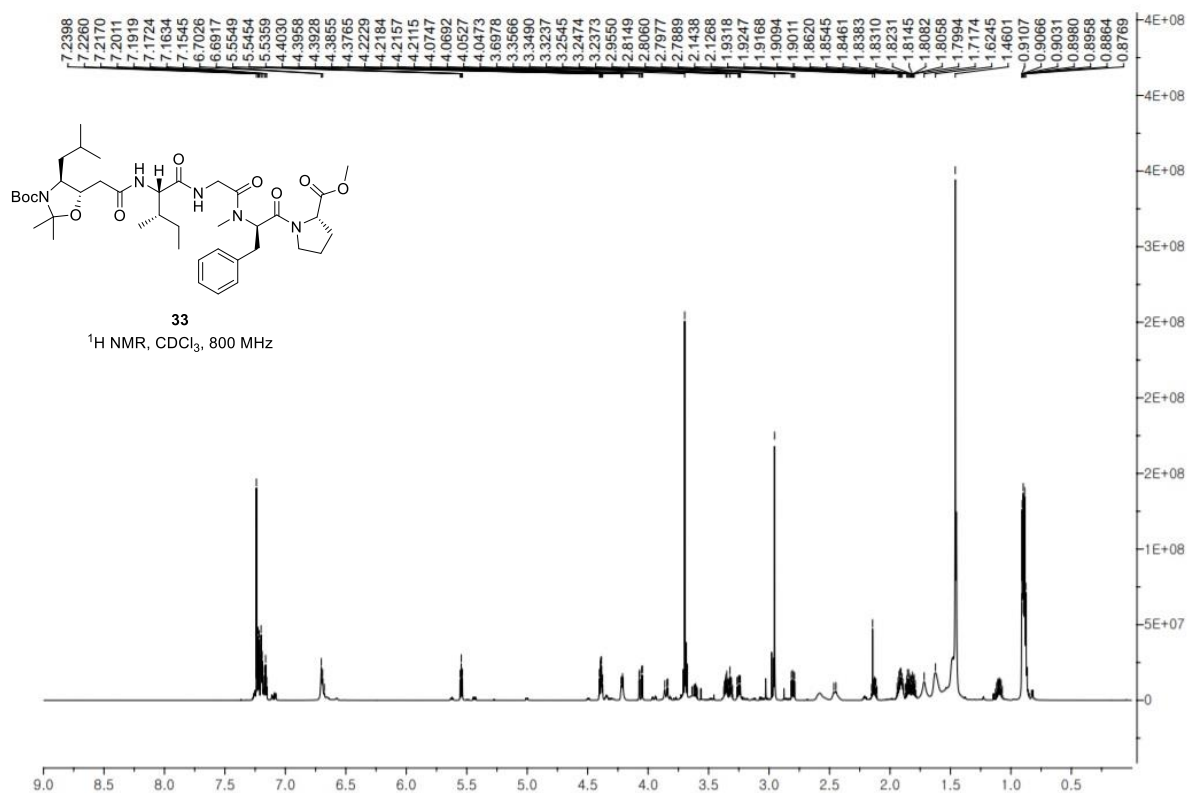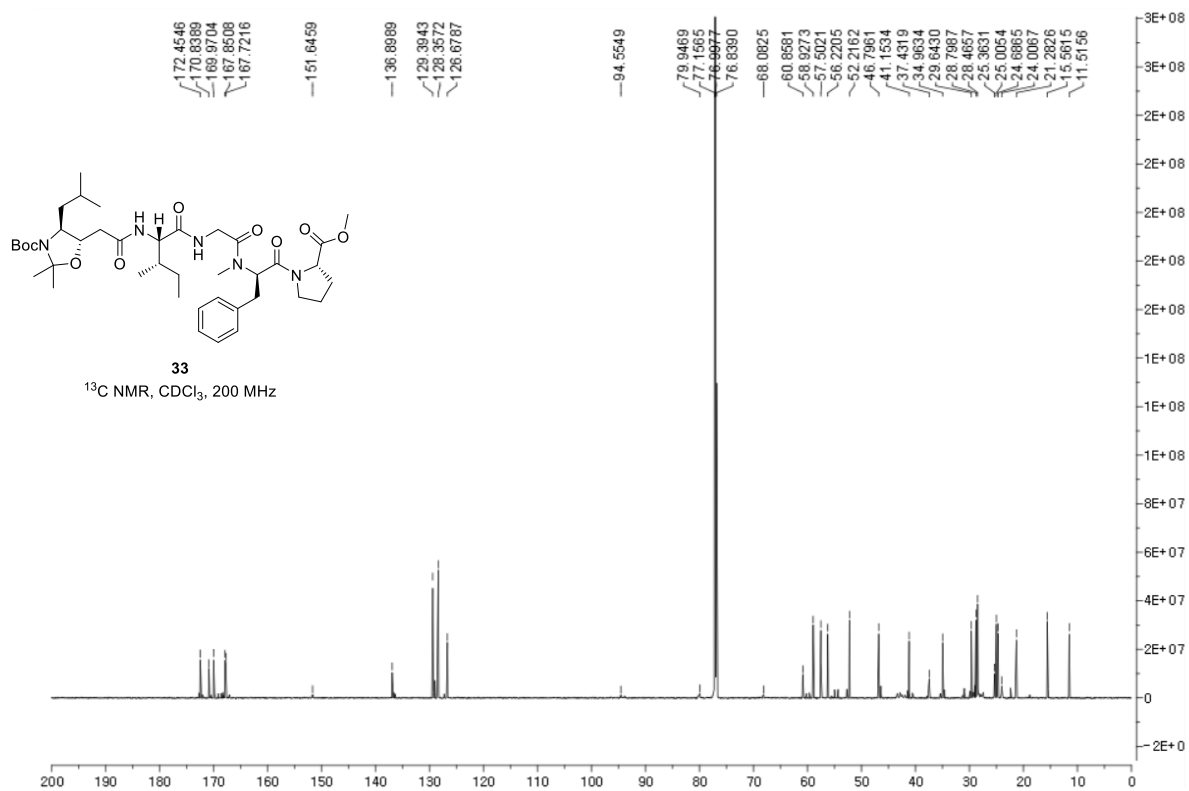

# <sup>1</sup>H NMR and <sup>13</sup>C NMR spectra of **34**

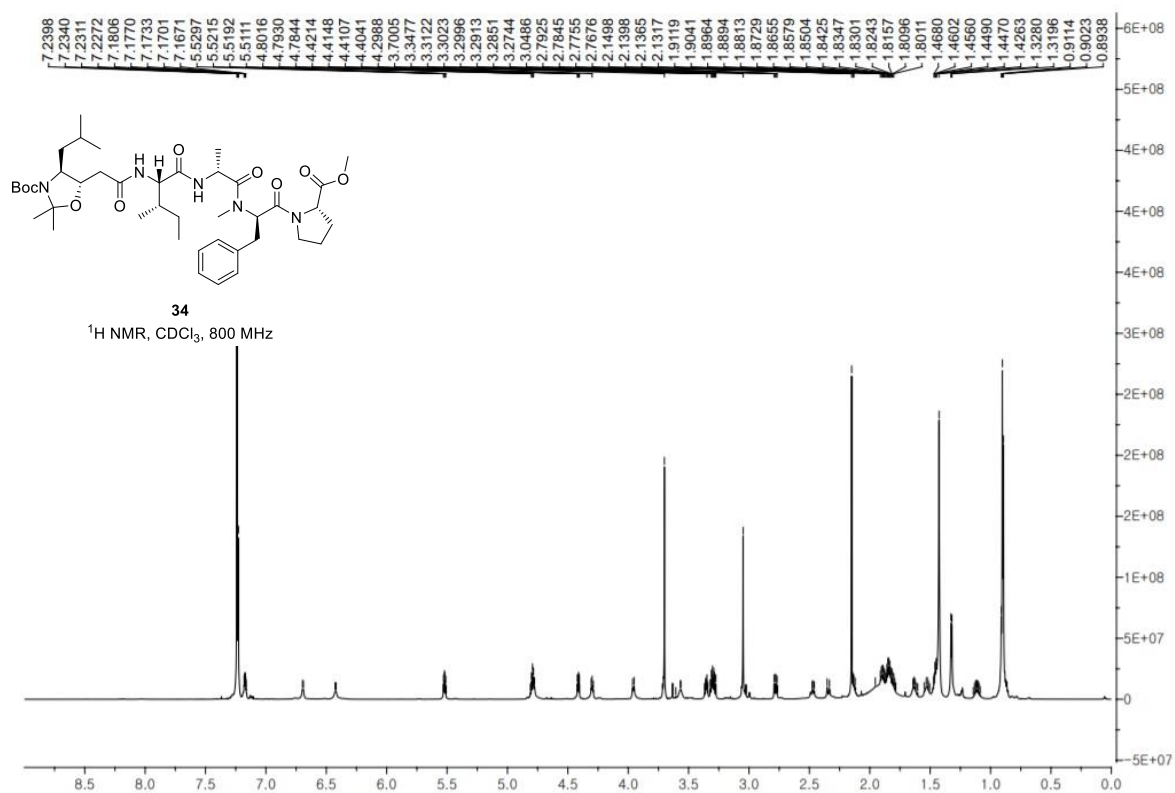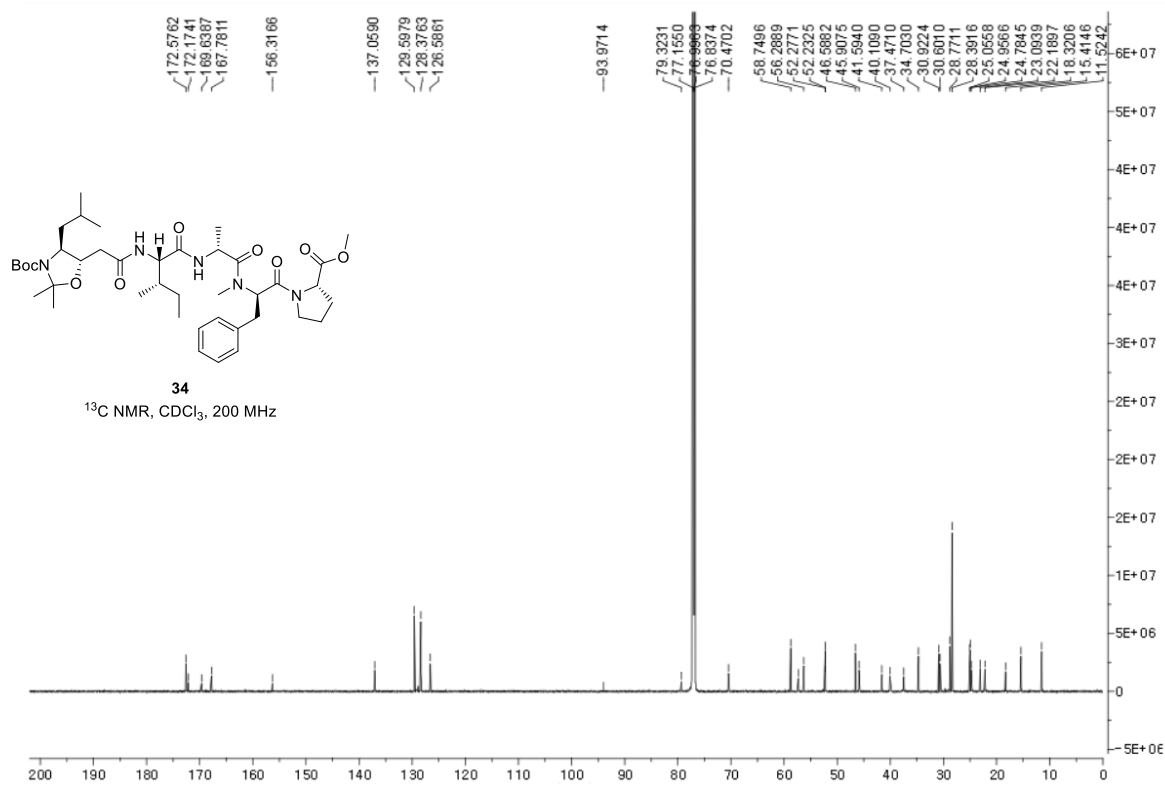

<sup>1</sup>H NMR and <sup>13</sup>C NMR spectra of the Sta-incorporated izenamide C (7)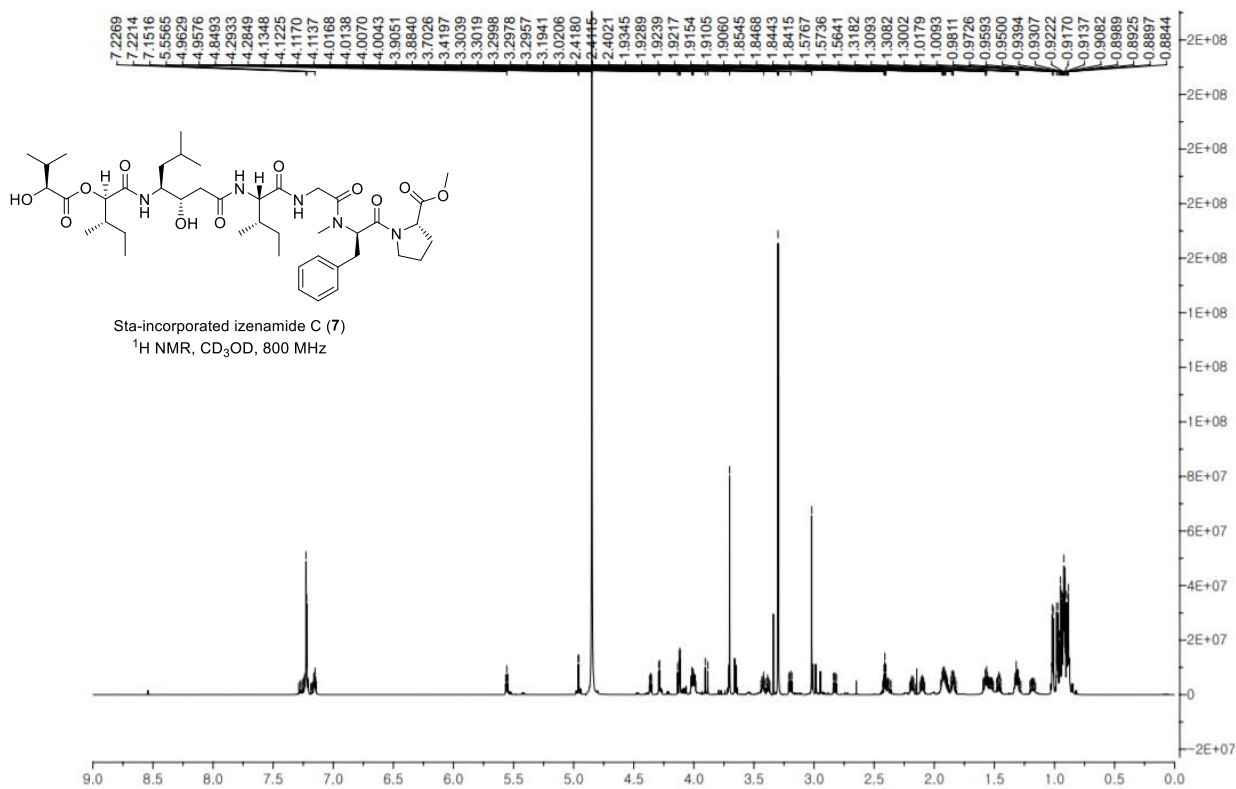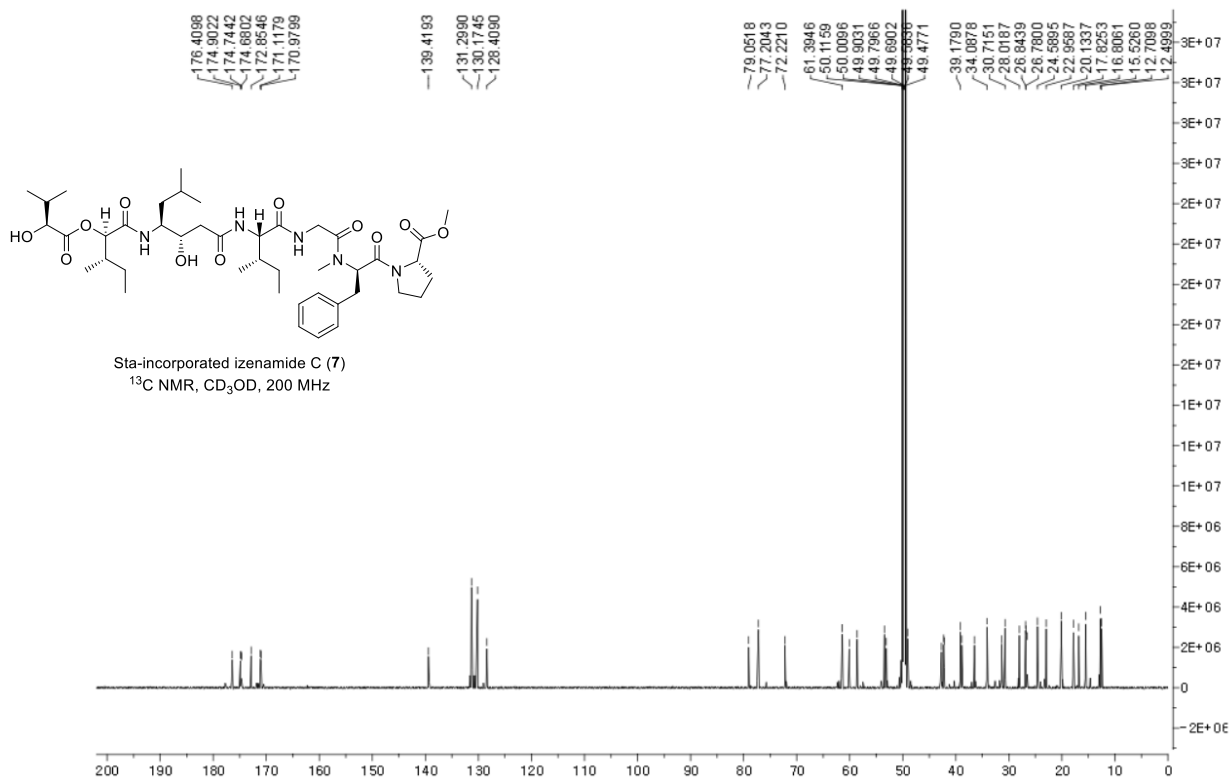

$^1\text{H}$  NMR and  $^{13}\text{C}$  NMR spectra of 18-*epi*-izenamide B (8)

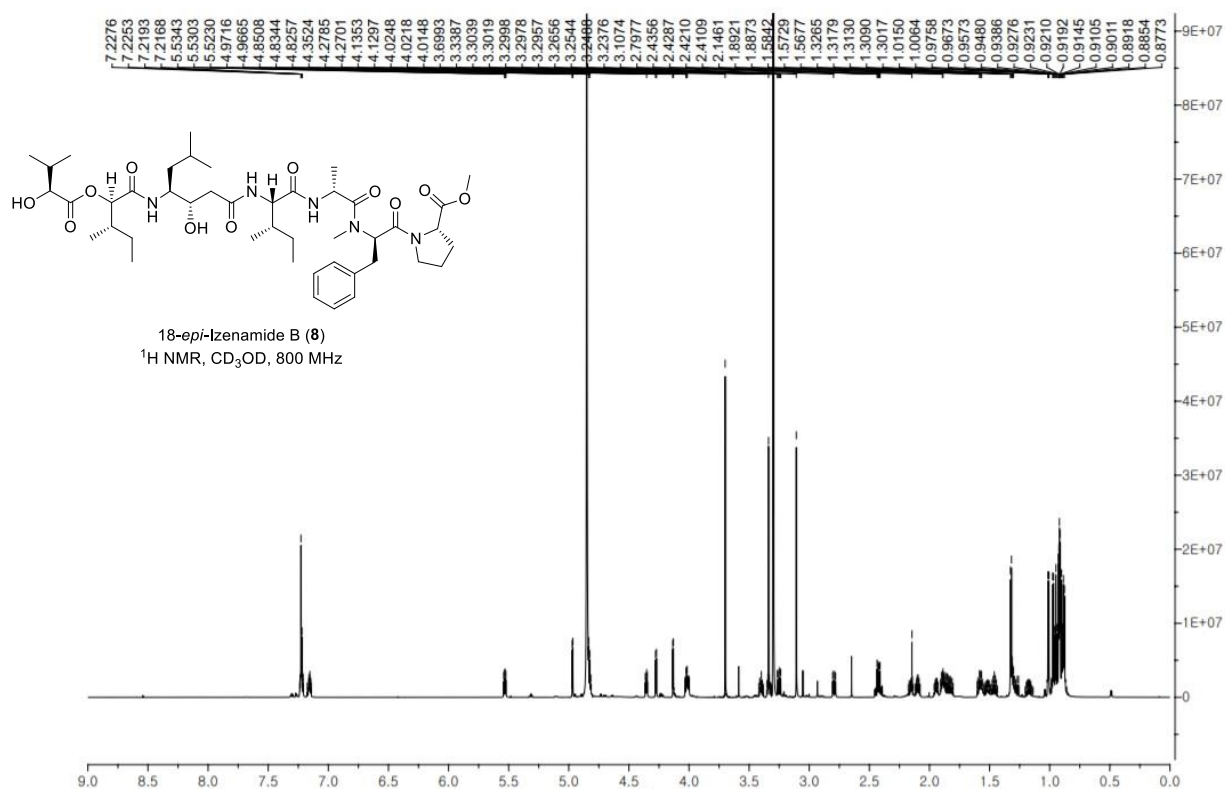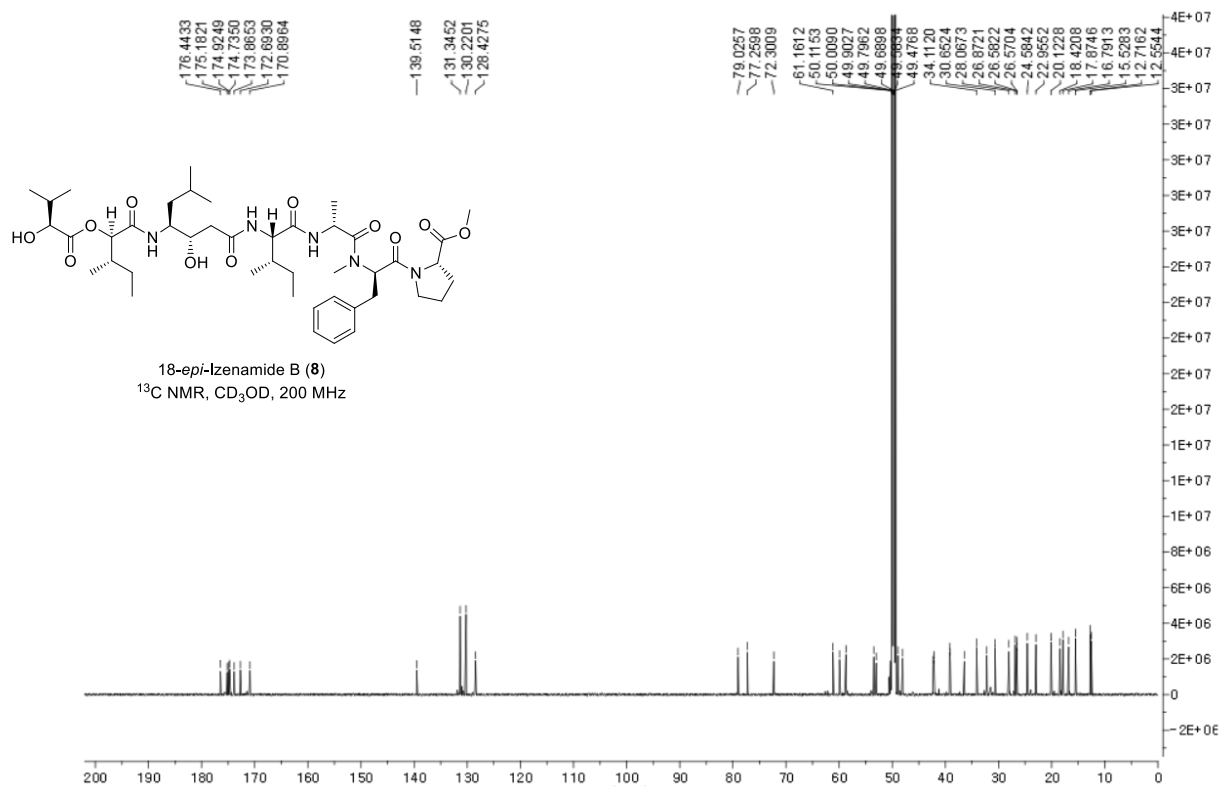

## II. Comparison of $^1\text{H}$ , $^{13}\text{C}$ NMR spectra of acetonide 24, 27, and 28

$^1\text{H}$  NMR of (24, 27, and 28),  $\text{CDCl}_3$ , 800 MHz;  $\delta$  7.00-0.60

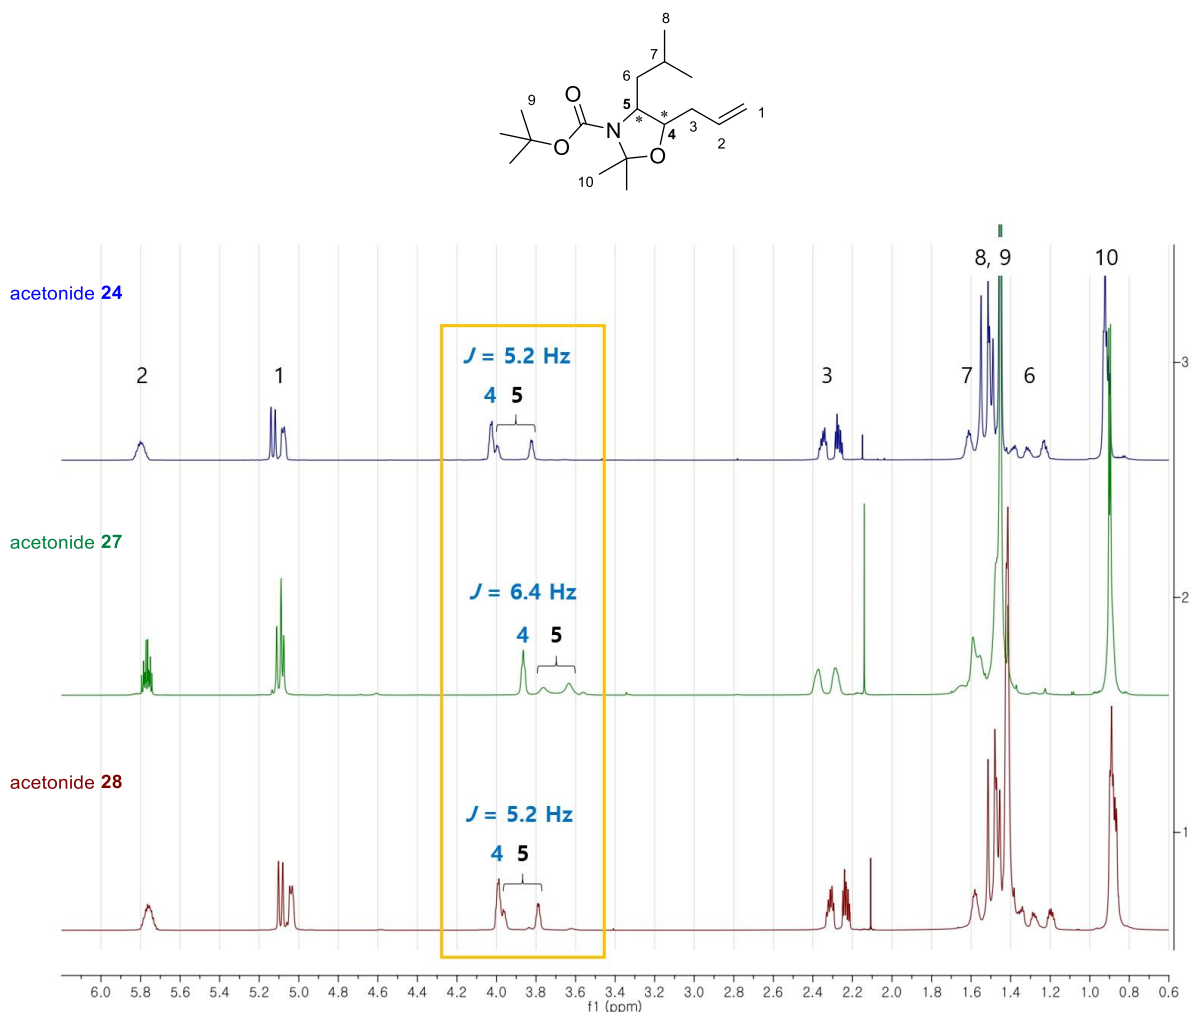

|     | 24                                                                      | 27                                                             | 28                                                            |
|-----|-------------------------------------------------------------------------|----------------------------------------------------------------|---------------------------------------------------------------|
| C1  | 5.14 (s, 0.5H), 5.12 (s, 0.5H),<br>5.08 (d, $J = 9.4$ Hz, 1H)           | 5.13 (s, 0.5H), 5.09 (s, 0.5H),<br>5.08 (d, $J = 10.4$ Hz, 1H) | 5.10 (s, 0.5H), 5.08 (s, 0.5H),<br>5.04 (d, $J = 9.8$ Hz, 1H) |
| C2  | 5.80-5.76 (m, 1H)                                                       | 5.77 (ddt, $J = 17.2, 10.2,$<br>7.0 Hz, 1H)                    | 5.80-5.72 (m, 1H)                                             |
| C3  | 2.35 (dt, $J = 14.1, 6.9$ Hz, 1H),<br>2.27 (dt, $J = 13.2, 6.4$ Hz, 1H) | 2.40-2.35 (m, 1H),<br>2.30-2.27 (m, 1H)                        | 2.31 (dt, $J = 14.3, 7.0$ Hz, 1H),<br>2.25-2.21 (m, 1H),      |
| C4  | 4.03 (d, $J = 5.2$ Hz, 1H)                                              | 3.86 (t, $J = 6.4$ Hz, 1H)                                     | 3.99 (d, $J = 5.2$ Hz, 1H)                                    |
| C5  | 3.99 (d, $J = 5.0$ Hz, 0.5H),<br>3.82 (d, $J = 5.1$ Hz, 0.5H)           | 3.76 (s, 0.5H),<br>3.63 (s, 0.5H)                              | 3.96 (d, $J = 5.1$ Hz, 0.5H),<br>3.79 (d, $J = 5.2$ Hz, 0.5H) |
| C6  | 1.43-1.36 (m, 1H),<br>1.33-1.21 (m, 1H)                                 | 1.50-1.42 (m, 2H)                                              | 1.38-1.31 (m, 1H),<br>1.30-1.18 (m, 1H)                       |
| C7  | 1.65-1.60 (m, 1H)                                                       | 1.70-1.61 (m, 1H)                                              | 1.60-1.56 (m, 1H)                                             |
| C8  | 1.53 (d, $J = 28.5$ Hz, 3H),<br>1.50 (d, $J = 13.9$ Hz, 3H)             | 1.60-1.53 (m, 3H)<br>1.50-1.42 (m, 3H)                         | 1.50 (d, $J = 28.0$ Hz, 3H),<br>1.46 (d, $J = 13.2$ Hz, 3H)   |
| C9  | 1.45 (s, 9H)                                                            | 1.50-1.42 (m, 9H)                                              | 1.41 (s, 9H)                                                  |
| C10 | 0.94-0.89 (m, 6H)                                                       | 0.90 (d, $J = 6.4$ Hz, 6H)                                     | 0.91-0.85 (m, 6H)                                             |

$^{13}\text{C}$  NMR of (**24**, **27**, and **28**),  $\text{CDCl}_3$ , 200 MHz;  $\delta$  200.00-10.0

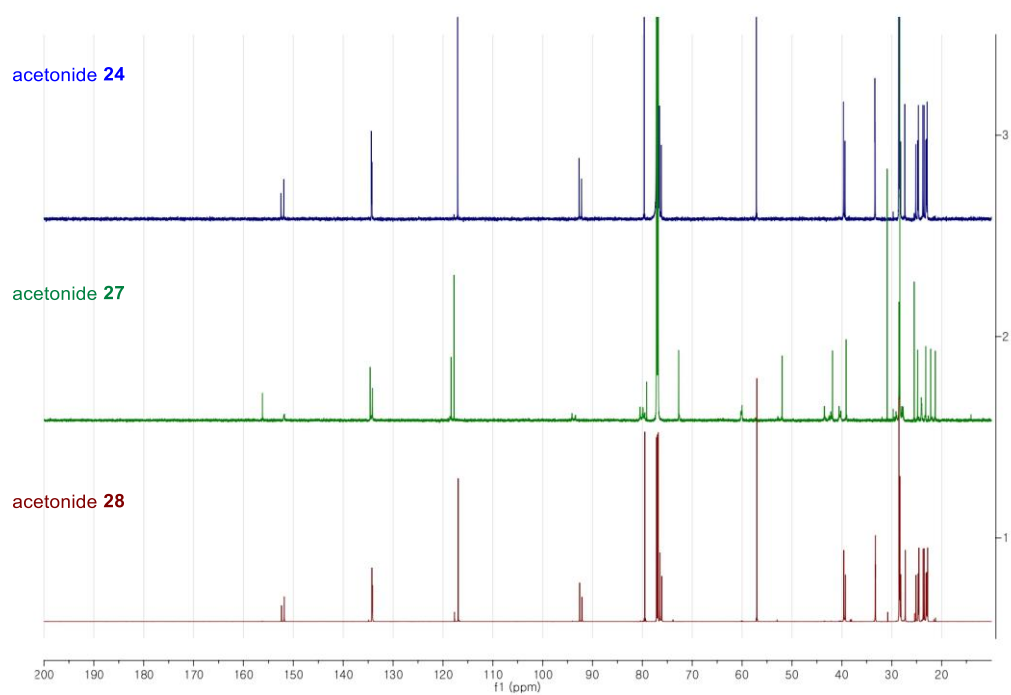

### III. Comparison of NMR spectra of Izenamide B Variants (4-6, 8) and Izenamide B (2)

$^1\text{H}$  NMR of (4-6, 8),  $\text{CD}_3\text{OD}$ , 800 MHz;  $\delta$  6.00-2.70 and 2.60-0.60

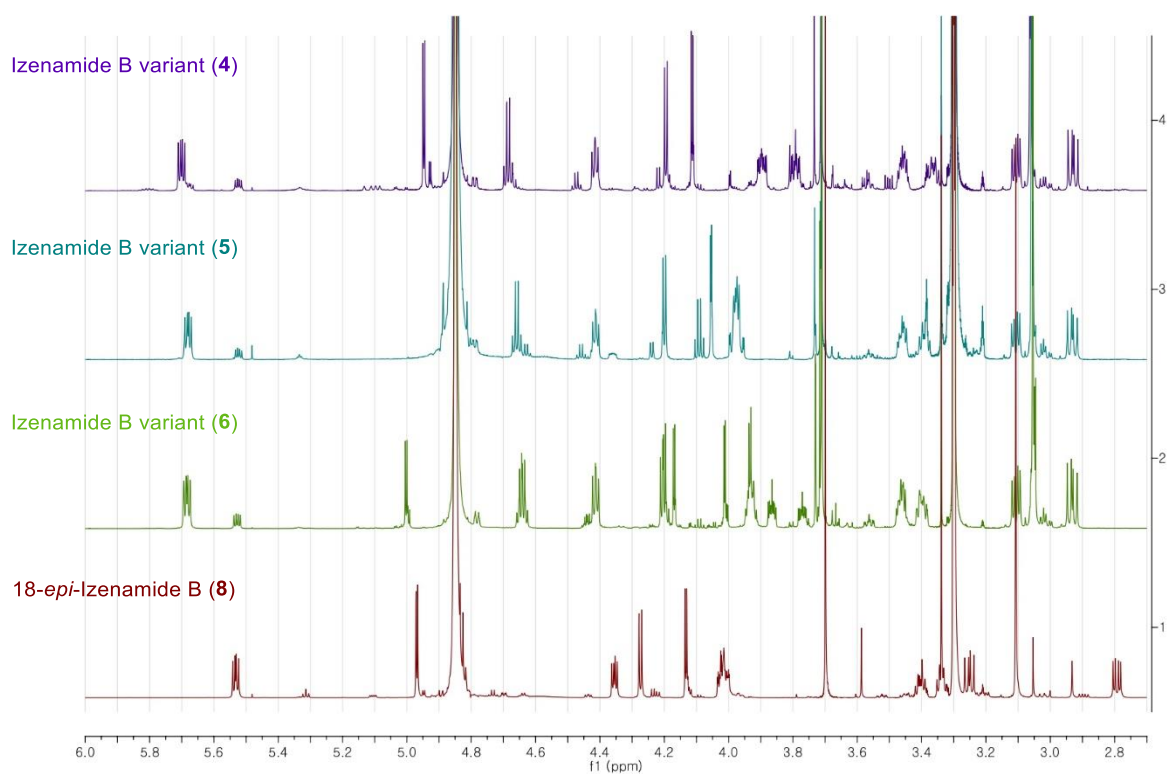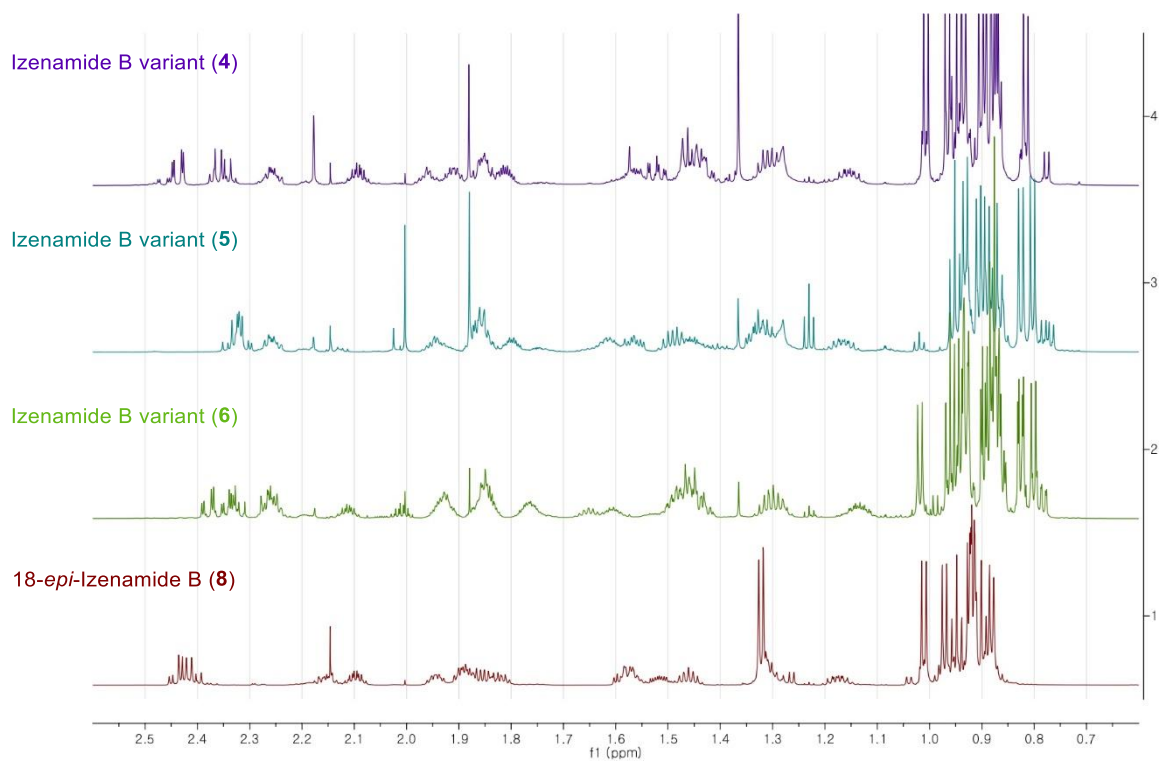

$^{13}\text{C}$  NMR of (4-6, 8),  $\text{CD}_3\text{OD}$ , 200 MHz;  $\delta$  190.0-120.0 and 90.0-5.0

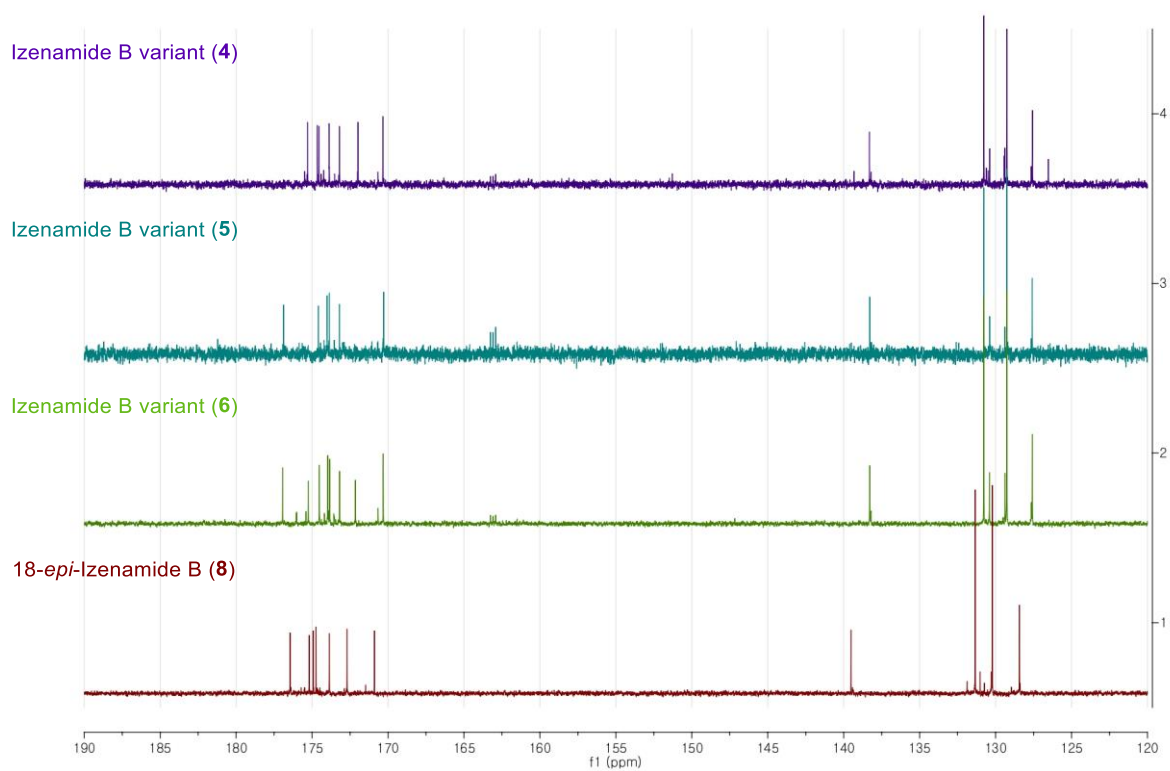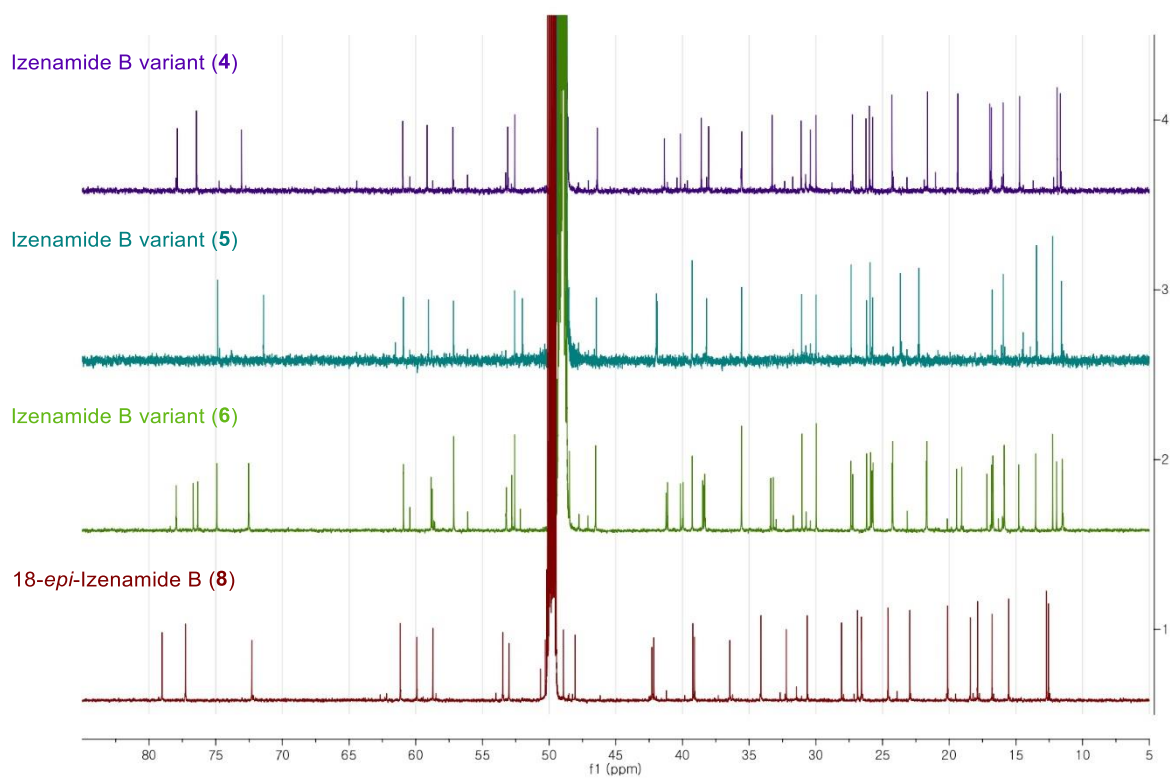

<sup>1</sup>H and <sup>13</sup>C NMR of Izenamide B (**2**) (ref. *Molecules* **2019**, *24*, 3242)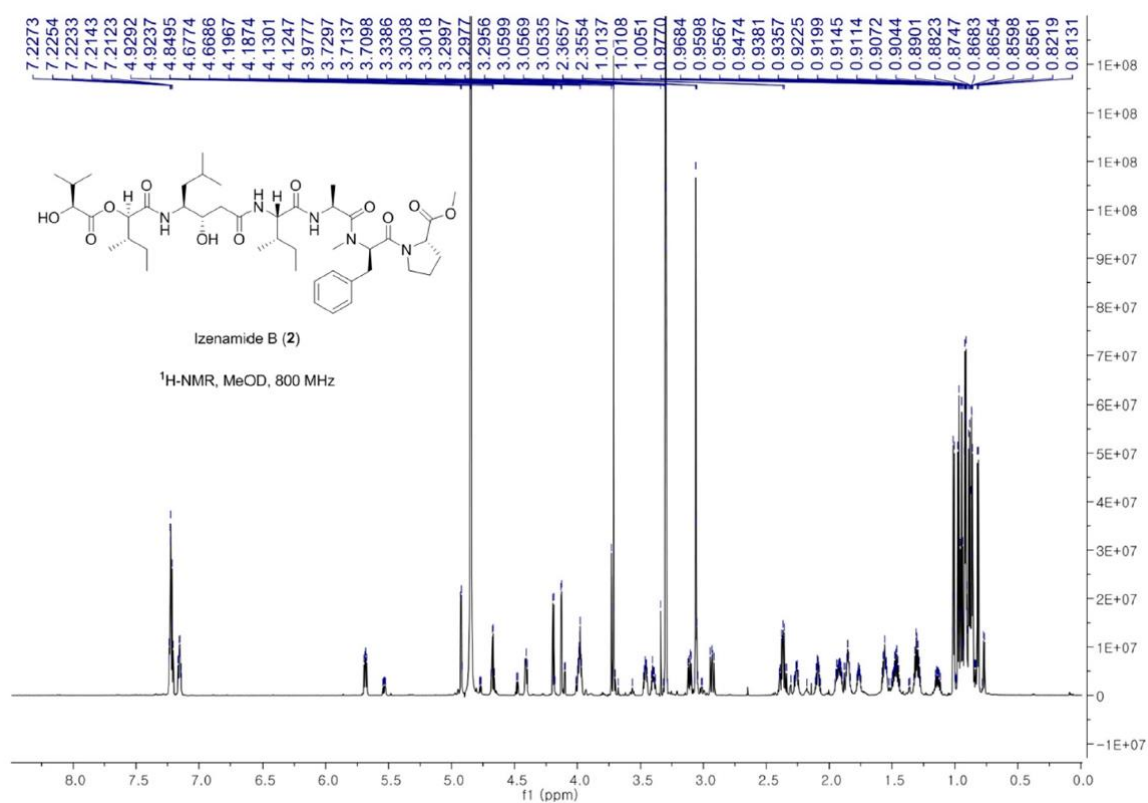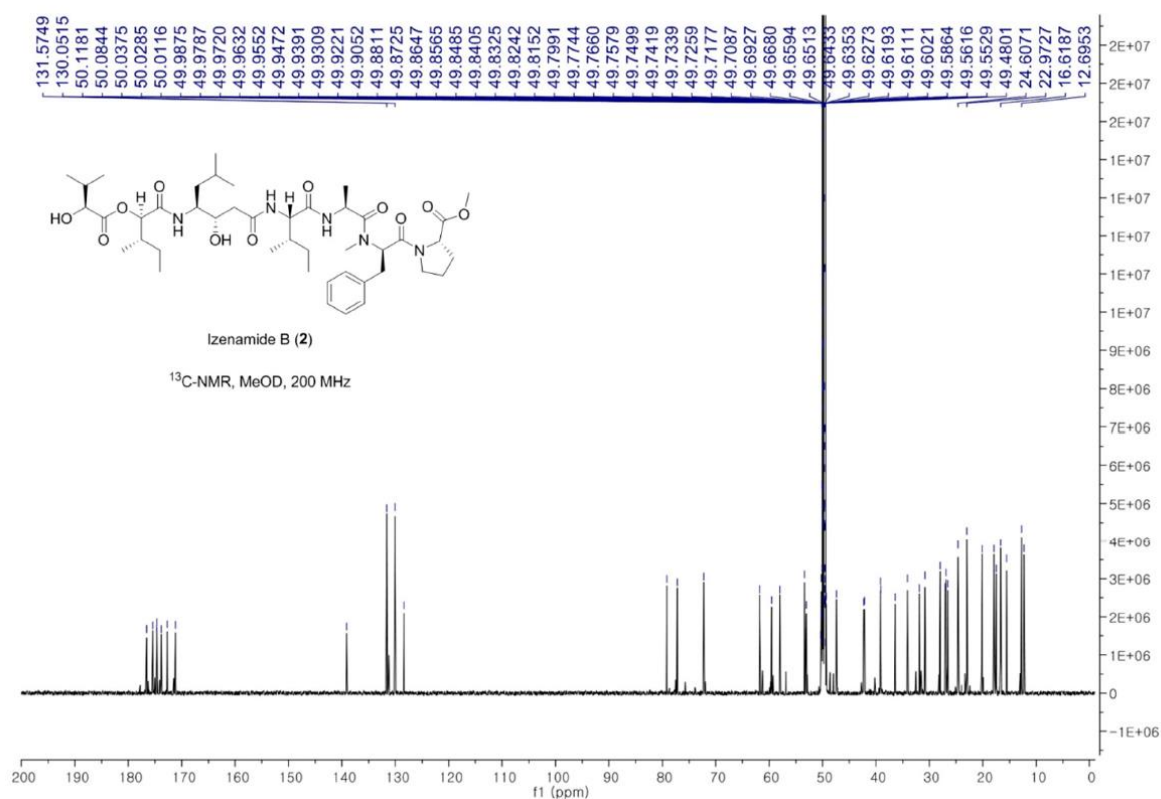

## IV. HRMS spectra of Izenamide Variants (4-8)

### HRMS spectra of izenamide B variant (4)

Data: F37580 Date: 29-Dec-2020 10:04  
Instrument: MStation  
Sample: **Iz-B-uu**  
Note: m-NBA  
Inlet: Direct Ion Mode: **FAB+**  
RT: 0.00 min Scan#: (1.126)  
Elements: C 50/0, H 100/0, N 7/0, O 15/0  
Mass Tolerance: 10ppm, 5mmu if m/z < 500, 10mmu if m/z > 1000  
Unsaturation (U.S.): -0.5 - 15.0

|   | Observed m/z    | Int%   | Err(ppm / mmu) | U.S. Composition      |
|---|-----------------|--------|----------------|-----------------------|
| 1 | <b>846.5220</b> | 100.00 | -1.0 / -0.6    | <b>C44 H72 N5 O11</b> |
| 2 |                 |        | -2.6 / -2.2    | C40 H74 N2 O12        |
| 3 |                 |        | +3.8 / +3.2    | C39 H72 N7 O13        |
| 4 |                 |        | +2.2 / +1.8    | C41 H74 N4 O14        |
| 5 |                 |        | +0.6 / +0.5    | C43 H76 N O15         |

Iz-B-uu, calcd 846.5220  
(M+H)<sup>+</sup> C<sub>44</sub>H<sub>72</sub>N<sub>5</sub>O<sub>11</sub>

### HRMS spectra of izenamide B variant (5)

Data: F36305 Date: 14-May-2021 17:30  
Instrument: MStation  
Sample: 1  
Note: m-NBA  
Inlet: Direct Ion Mode: **FAB+**  
RT: 6.63 min Scan#: (160.292)  
Elements: C 50/0, H 100/0, N 7/0, O 15/0  
Mass Tolerance: 10ppm, 5mmu if m/z < 500, 10mmu if m/z > 1000  
Unsaturation (U.S.): -0.5 - 15.0

|   | Observed m/z    | Int%  | Err(ppm / mmu) | U.S. Composition      |
|---|-----------------|-------|----------------|-----------------------|
| 1 | <b>846.5224</b> | 27.41 | -0.5 / -0.4    | <b>C44 H72 N5 O11</b> |
| 2 |                 |       | -2.1 / -1.8    | C40 H74 N2 O12        |
| 3 |                 |       | +4.2 / +3.6    | C39 H72 N7 O13        |
| 4 |                 |       | +2.7 / +2.2    | C41 H74 N4 O14        |
| 5 |                 |       | +1.1 / +0.9    | C43 H76 N O15         |

M+H<sup>+</sup>

### HRMS spectra of izenamide B variant (6)

Data: F37582 Date: 29-Dec-2020 11:52  
Instrument: MStation  
Sample: **Iz-B-dol**  
Note: m-NBA  
Inlet: Direct Ion Mode: **FAB+**  
RT: 0.00 min Scan#: (1.150)  
Elements: C 50/0, H 100/0, N 10/0, O 15/0  
Mass Tolerance: 10ppm, 5mmu if m/z < 500, 10mmu if m/z > 1000  
Unsaturation (U.S.): -0.5 - 15.0

|    | Observed m/z    | Int%   | Err(ppm / mmu) | U.S. Composition      |
|----|-----------------|--------|----------------|-----------------------|
| 1  | <b>846.5230</b> | 100.00 | +1.8 / +1.5    | C42 H70 N8 O10        |
| 2  |                 |        | +0.2 / +0.2    | <b>C44 H72 N5 O11</b> |
| 3  |                 |        | -1.4 / -1.2    | C40 H74 N2 O12        |
| 4  |                 |        | -8.3 / -7.0    | C38 H72 N9 O12        |
| 5  |                 |        | +6.5 / +5.5    | C37 H70 N10 O12       |
| 6  |                 |        | -9.9 / -8.4    | C40 H74 N8 O13        |
| 7  |                 |        | +4.9 / +4.2    | C39 H72 N7 O13        |
| 8  |                 |        | +5.4 / +2.8    | C41 H74 N4 O14        |
| 9  |                 |        | +1.8 / +1.5    | C43 H76 N O15         |
| 10 |                 |        | -5.2 / -4.4    | C35 H74 N8 O15        |
| 11 |                 |        | +9.7 / +8.2    | C34 H72 N9 O15        |

Iz-B-dol, calcd C<sub>44</sub>H<sub>72</sub>N<sub>5</sub>O<sub>11</sub>  
(M+H)<sup>+</sup> 846.5220

# HRMS spectra of Sta-incorporated izenamide C (7)

## Qualitative Compound Report

|                               |                |                      |                      |
|-------------------------------|----------------|----------------------|----------------------|
| <b>Data File</b>              | SIZ-04_8.d     | <b>Sample Name</b>   | SIZ-04               |
| <b>Sample Type</b>            | Sample         | <b>Position</b>      | P1-F1                |
| <b>Instrument Name</b>        | Instrument 1   | <b>User Name</b>     |                      |
| <b>Acq Method</b>             | DIP method-2.m | <b>Acquired Time</b> | 7/14/2019 3:52:56 PM |
| <b>IRM Calibration Status</b> | Success        | <b>DA Method</b>     | Default.m            |
| <b>Comment</b>                |                |                      |                      |
| <b>Sample Group</b>           | <b>Info.</b>   |                      |                      |
| <b>Stream Name</b>            | LC 1           |                      |                      |

### Compound Table

| Compound Label     | RT   | Mass     | Abund | Formula     | Tgt Mass | Diff (ppm) |
|--------------------|------|----------|-------|-------------|----------|------------|
| Cpd 1: C43H69N5O11 | 0.21 | 831.5005 | 54036 | C43H69N5O11 | 831.4994 | 1.32       |

| Compound Label     | RT   | Algorithm       | Mass     |
|--------------------|------|-----------------|----------|
| Cpd 1: C43H69N5O11 | 0.21 | Find By Formula | 831.5005 |

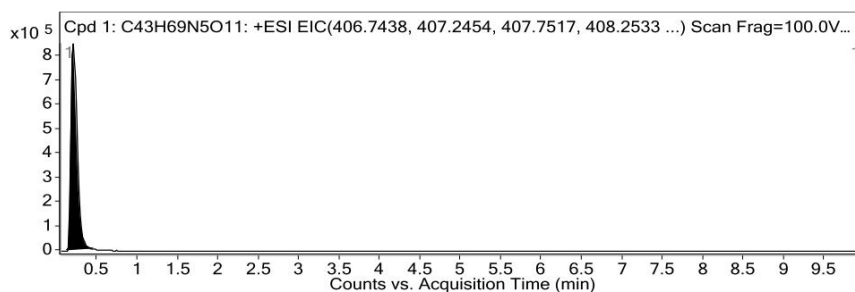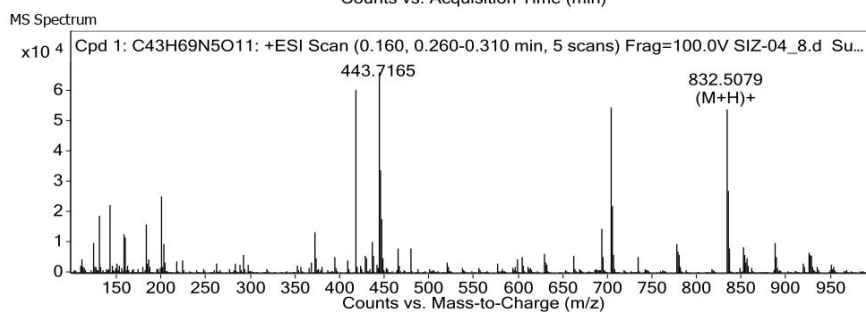

## Qualitative Compound Report

MS Zoomed Spectrum

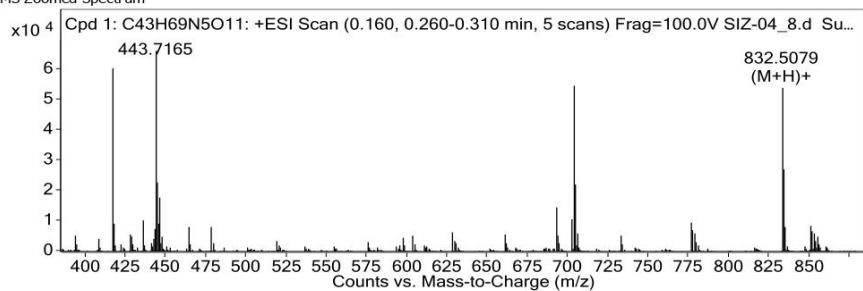

### MS Spectrum Peak List

| m/z      | Calc m/z | Diff(ppm) | z | Abund | Formula           | Ion      |
|----------|----------|-----------|---|-------|-------------------|----------|
| 415.7504 | 415.7491 | 2.96      | 2 | 116   | C43 H69 N5 O11    | M+2      |
| 416.7581 | 416.757  | 2.79      | 2 | 60427 | C43 H71 N5 O11    | (M+2H)+2 |
| 417.2587 | 417.2585 | 0.45      | 2 | 32100 | C43 H71 N5 O11    | (M+2H)+2 |
| 443.7165 |          |           |   | 66157 |                   |          |
| 444.2182 |          |           |   | 34158 |                   |          |
| 444.7185 |          |           |   | 22898 |                   |          |
| 446.2639 |          |           |   | 17948 |                   |          |
| 832.5079 | 832.5066 | 1.5       | 1 | 54036 | C43 H70 N5 O11    | (M+H)+   |
| 833.5106 | 833.5098 | 1         | 1 | 27134 | C43 H70 N5 O11    | (M+H)+   |
| 854.4874 | 854.4886 | -1.4      | 1 | 4910  | C43 H69 N5 Na O11 | (M+Na)+  |

--- End Of Report ---

# HRMS spectra of 18-*epi*-izenamide B (8)

## Qualitative Compound Report

|                               |                   |                      |                      |
|-------------------------------|-------------------|----------------------|----------------------|
| <b>Data File</b>              | SIZ-05_2.d        | <b>Sample Name</b>   | SIZ-05               |
| <b>Sample Type</b>            | Sample            | <b>Position</b>      | P1-F2                |
| <b>Instrument Name</b>        | Instrument 1      | <b>User Name</b>     |                      |
| <b>Acq Method</b>             | DIP method-Op-1.m | <b>Acquired Time</b> | 7/13/2019 4:57:47 PM |
| <b>IRM Calibration Status</b> | Success           | <b>DA Method</b>     | Default.m            |
| <b>Comment</b>                |                   |                      |                      |
| <b>Sample Group</b>           | <b>Info.</b>      |                      |                      |
| <b>Stream Name</b>            | LC 1              |                      |                      |

### Compound Table

| Compound Label     | RT    | Mass    | Abund | Formula     | Tgt Mass | Diff (ppm) |
|--------------------|-------|---------|-------|-------------|----------|------------|
| Cpd 1: C44H71N5O11 | 0.209 | 845.516 | 17627 | C44H71N5O11 | 845.515  | 1.21       |

| Compound Label     | RT    | Algorithm       | Mass    |
|--------------------|-------|-----------------|---------|
| Cpd 1: C44H71N5O11 | 0.209 | Find By Formula | 845.516 |

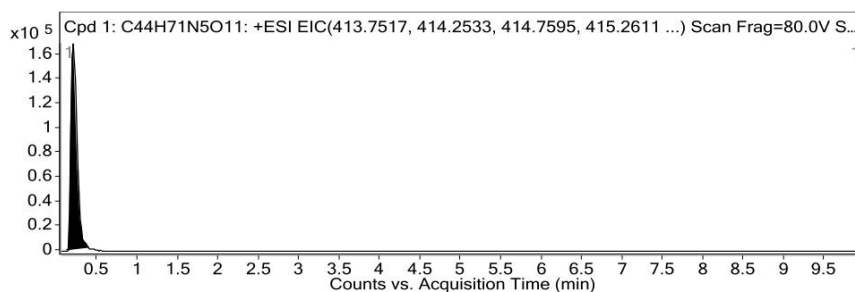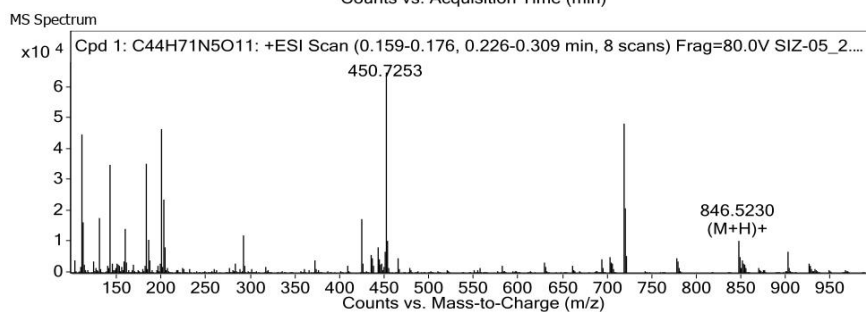

## Qualitative Compound Report

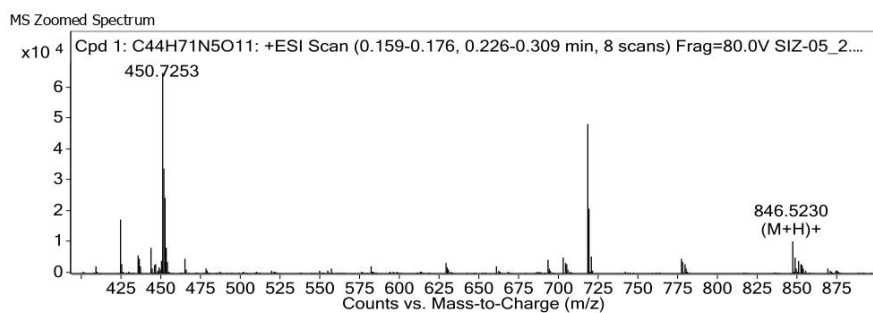

MS Spectrum Peak List

| m/z      | Calc m/z | Diff(ppm) | z | Abund | Formula                                                           | Ion      |
|----------|----------|-----------|---|-------|-------------------------------------------------------------------|----------|
| 423.7658 | 423.7648 | 2.49      | 2 | 17627 | C <sub>44</sub> H <sub>73</sub> N <sub>5</sub> O <sub>11</sub>    | (M+2H)+2 |
| 424.2676 | 424.2664 | 2.94      | 2 | 9040  | C <sub>44</sub> H <sub>73</sub> N <sub>5</sub> O <sub>11</sub>    | (M+2H)+2 |
| 450.2268 |          |           |   | 6912  |                                                                   |          |
| 450.7253 |          |           |   | 64820 |                                                                   |          |
| 451.2268 |          |           |   | 34030 |                                                                   |          |
| 451.7266 |          |           |   | 24693 |                                                                   |          |
| 452.2283 |          |           |   | 10457 |                                                                   |          |
| 452.7255 |          |           |   | 8556  |                                                                   |          |
| 846.523  | 846.5223 | 0.87      | 1 | 10452 | C <sub>44</sub> H <sub>72</sub> N <sub>5</sub> O <sub>11</sub>    | (M+H)+   |
| 868.5043 | 868.5042 | 0.03      | 1 | 1783  | C <sub>44</sub> H <sub>71</sub> N <sub>5</sub> Na O <sub>11</sub> | (M+Na)+  |

--- End Of Report ---
